# Supplementary material
Source: PubMed Central journal article supplement (PMC2713824)
Supplement: NIHMS103774-supplement-4_si_004.pdf [file NIHMS103774-supplement-4_si_004.pdf]

Supporting Information for:

## Synthesis and Reactivity of a Mono- $\sigma$ -Aryl Palladium(IV) Fluoride Complex

Nicholas D. Ball and Melanie S. Sanford\*

*Department of Chemistry, University of Michigan, 930 North University Avenue, Ann Arbor, Michigan 48109*

### General Procedures:

NMR spectra were obtained on a Varian Inova 400 (399.96 MHz for  $^1\text{H}$ ; 376.34 MHz for  $^{19}\text{F}$ ; 100.57 MHz for  $^{13}\text{C}$ ) or a MR400 (400.53 MHz for  $^1\text{H}$ ; 376.87 MHz for  $^{19}\text{F}$ ; 100.71 MHz for  $^{13}\text{C}$ ) spectrometer.  $^1\text{H}$ ,  $^{19}\text{F}$  and  $^{13}\text{C}$  chemical shifts are reported in parts per million (ppm) relative to TMS, with the residual solvent peak used as an internal reference.  $^{19}\text{F}$  NMR spectra are referenced on a unified scale, where the single primary reference is the frequency of the residual solvent peak in the  $^1\text{H}$  NMR spectrum.<sup>1</sup> Several  $^{19}\text{F}$  NMR experiments were conducted using “No-D” parameters and are noted accordingly.<sup>2</sup>  $^1\text{H}$  and  $^{19}\text{F}$  multiplicities are reported as follows: singlet (s), doublet (d), doublet of doublets (dd), quartet (q), and multiplet (m). Elemental analyses were conducted by Atlantic Microlabs in Norcross, Georgia. Sonication was performed using a VWR Model 75H7 ultrasound bath, with the temperature regulated by a Neslab RTE-111 recirculating chiller. IR spectra were obtained on a Perkin-Elmer Spectrum BX FT-IR spectrometer.

### Materials and Methods:

The palladium complexes  $\text{Pd}(\text{dba})_2$ <sup>3</sup> and (*t*-Bu-bpy) $\text{PdCl}_2$ <sup>4</sup> were prepared according to literature procedures. Authentic samples of biaryl products **4a–c** were prepared as described in the literature by McClure and coworkers.<sup>5</sup>  $\text{AgF}$ ,  $\text{XeF}_2$ , 1-fluoro-4-iodobenzene, 1-iodobenzotrifluoride, 1,4-difluorobenzene (**3a**), and 4-fluorobenzotrifluoride (**3b**) were obtained from Matrix Chemicals. 4,4'-Di-*tert*-butyl-2,2'-bipyridine, 4-iodoanisole, 1-chloro-4-fluorobenzene, 1-fluoro-2,4,6-trimethylpyridium tetrafluoroborate, and *N*-fluorosulfanamide were obtained from Aldrich. 4-Fluoroanisole (**3c**) was obtained from Acros. All reagents were used as received. Nitrobenzene-*d*<sub>5</sub>,  $\text{CD}_2\text{Cl}_2$ , and  $\text{CDCl}_3$  were obtained from Cambridge Isotope Laboratories, and nitrobenzene was obtained from Acros. All other solvents were obtained from Fisher Chemical. Tetrahydrofuran, dichloromethane, and pentane were purified using an Innovative Technologies (IT) solvent purification system consisting of a copper catalyst, activated alumina, and molecular sieves.  $\text{CD}_2\text{Cl}_2$  was distilled from  $\text{CaH}_2$ . Acetone was distilled from  $\text{CaSO}_4$ . Nitrobenzene and nitrobenzene-*d*<sub>5</sub> were distilled from  $\text{P}_2\text{O}_5$  and placed over 4Å molecular sieves. Benzene and hexanes were distilled from  $\text{Na}^0$ /benzophenone. All syntheses were conducted using standard Schlenk techniques or in an inert atmosphere glovebox unless otherwise stated.

## Experimental Details

General procedure for the synthesis of complexes **1a-1c**: Under nitrogen, Pd(dba)<sub>2</sub> (2.9 g, 5.1 mmol, 1.0 equiv) was weighed into a 250 mL round bottom flask and dissolved in THF (72 mL). 4, 4'-Di-*tert*-butylbipyridine (1.9 g, 6.6 mmol, 1.3 equiv) was added, and the resulting mixture was stirred at 25 °C for 15 min. The aryl iodide (7.1 mmol, 1.4 equiv) was added, and the reaction was warmed to 60 °C for 3 h. The reaction mixture was filtered through a plug of Celite, and the solvent was removed under reduced pressure. The resulting solid was washed with hexanes (3 x 50 mL) and then with a 50:50 mixture of ether and hexanes (~400 mL) until residual dibenzylidene acetone (dba) was completely removed. The product was then redissolved in CH<sub>2</sub>Cl<sub>2</sub> (20 mL) and stirred with activated charcoal for 30 min. This suspension was filtered through a plug of Celite, and the solvent was removed *in vacuo* to yield the products as orange solids.

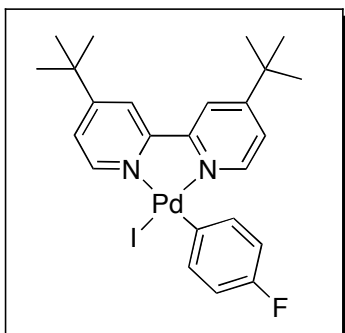

Complex **1a** (1.6 g, 31% yield). <sup>1</sup>H NMR (CDCl<sub>3</sub>): δ 9.47 (d, *J* = 6 Hz, 1H), 7.95 (multiple peaks, 2H), 7.53 (d, *J* = 6 Hz, 1H), 7.48 (d, *J* = 6 Hz, 1H), 7.30 (multiple peaks, 3H), 6.81 (multiple peaks, 2H), 1.40 (s, 9H), 1.37 (s, 9H); <sup>19</sup>F NMR (CDCl<sub>3</sub>): δ -123.2 (m, 1F); <sup>13</sup>C NMR (CDCl<sub>3</sub>): δ 163.33, 163.27, 160.93 (d, *J* = 239.8 Hz), 155.91, 153.86, 152.52, 149.55, 138.52, 136.67 (d, *J* = 5 Hz), 123.86 (br s), 123.54, 118.43, 118.01, 113.98 (d, *J* = 19 Hz), 35.53, 35.48, 30.38, 30.26. Anal. Calc. for C<sub>24</sub>H<sub>28</sub>FIN<sub>2</sub>Pd: C, 48.30, H, 4.73, N, 4.69; Found: C, 48.09, H, 4.75, N, 4.72.

Notably, small amounts (~7%) of [(*t*-Bu-bpy)Pd(I)<sub>2</sub>] were observed in the <sup>1</sup>H, and <sup>13</sup>C NMR spectra of most isolated samples of **1a**.

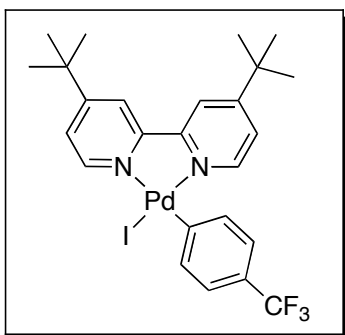

Complex **1b** (1.1 g, 33% yield). <sup>1</sup>H NMR (CDCl<sub>3</sub>): δ 9.49 (d, *J* = 6 Hz, 1H), 7.95 (multiple peaks, 2H), 7.55 (d, *J* = 8 Hz, 2H), 7.48 (multiple peaks, 2H), 7.34 (m, 1H), 7.25 (d, *J* = 8 Hz, 2H), 1.41 (s, 9H), 1.38 (s, 9H); <sup>19</sup>F NMR (CDCl<sub>3</sub>): δ -61.8 (s, 3F); <sup>13</sup>C NMR (CDCl<sub>3</sub>): 163.54, 163.43, 155.94, 153.84, 153.60, 152.65, 149.52, 136.82, 125.48 (q, *J* = 32 Hz), 124.99 (q, *J* = 272 Hz), 123.97, 123.73, 123.02 (q, *J* = 4 Hz), 118.49, 118.05, 35.54, 35.48, 30.56, 30.23. Anal. Calc. for C<sub>25</sub>H<sub>28</sub>F<sub>3</sub>IN<sub>2</sub>Pd: C, 46.42, H, 4.36, N, 4.33; Found: C, 46.36, H, 4.33, N, 4.35. Notably, small amounts (~8%)

of [(*t*-Bu-bpy)Pd(I)<sub>2</sub>] were observed in the <sup>1</sup>H and <sup>13</sup>C NMR spectra of most isolated samples of **1b**.

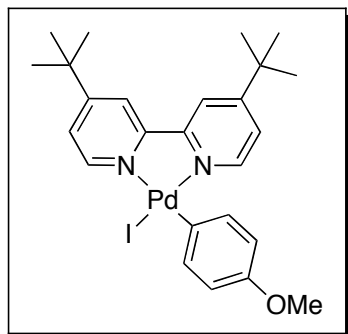

**Complex 1c** (1.0 g, 33% yield).  $^1\text{H}$  NMR ( $\text{CDCl}_3$ ):  $\delta$  9.49 (d,  $J = 6$  Hz, 1H), 7.94 (multiple peaks, 2H), 7.61 (dd,  $J = 6, 2$  Hz, 1H), 7.48 (dd,  $J = 6, 2$  Hz, 1H), 7.31 (dd,  $J = 5, 2$  Hz, 1H), 7.25 (d,  $J = 8$  Hz, 2H), 6.73 (d,  $J = 8$  Hz, 2H), 3.76 (s, 3H), 1.41 (s, 9H), 1.37 (s, 9H).  $^{13}\text{C}$  NMR ( $\text{CDCl}_3$ ):  $\delta$  163.09, 163.05, 156.64, 155.87, 153.87, 153.77, 152.58, 149.86, 136.36, 134.06, 123.81, 123.46, 117.84, 113.58, 55.16, 35.48, 35.43, 30.38, 30.26. Anal. Calc. for  $\text{C}_{25}\text{H}_{31}\text{IN}_2\text{OPd}$ : C, 49.32, H, 5.13, N, 4.60; Found: C, 49.12, H, 5.19, N, 4.60. Notably, small amounts ( $\sim 8\%$ ) of  $[(t\text{-Bu-bpy})\text{Pd}(\text{I})_2]$  were observed in the  $^1\text{H}$ , and  $^{13}\text{C}$  NMR spectra of most isolated samples of **1c**.

General procedure for the synthesis of complexes 2a-2c.  $[(t\text{-Bu-bpy})\text{Pd}(\text{Ar})(\text{I})]$  (3.6-3.8 mmol, 1 equiv) and AgF (3.9 equiv) were dissolved in benzene (20 mL) in a 50 mL amber glass jar. The jar was sealed with a Teflon-lined cap, and the reaction was sonicated in the dark at 25 °C for 1.5-4 h. The resulting mixture was filtered through a plug of Celite in the drybox. The plug was washed with benzene (1 x 5 mL) and then with  $\text{CH}_2\text{Cl}_2$  (5 x 2 mL). This filtration was repeated to remove residual silver salts. The solvent was then removed under reduced pressure, and pentane was added to precipitate a yellow solid. The solid was collected and dried *in vacuo* to afford the product as a yellow solid. It should be noted that without the second filtration, the filtrate changes color from yellow to gold over several minutes, which is indicative of impurities in the product (as confirmed by  $^1\text{H}$  and  $^{19}\text{F}$  NMR spectroscopy).

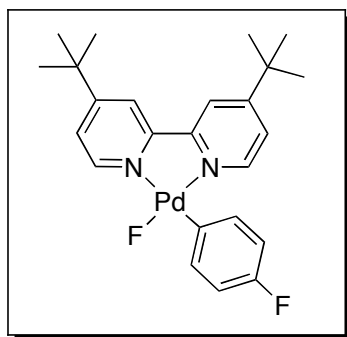

**Complex 2a** (0.42 g, 83% yield).  $^1\text{H}$  NMR ( $\text{CD}_2\text{Cl}_2$ ):  $\delta$  8.74 (d,  $J = 6$  Hz, 1H), 8.08 (d,  $J = 6$  Hz, 1H), 8.00 (d,  $J = 2$  Hz, 1H), 7.98 (d,  $J = 2$  Hz, 1H), 7.62 (dd,  $J = 4, 2$  Hz, 1H), 7.40 (multiple peaks, 2H), 7.29 (dd,  $J = 4, 2$  Hz, 1H), 6.85 (dd,  $J = 11, 9$  Hz, 2H), 1.44 (s, 9H), 1.38 (s, 9H);  $^{19}\text{F}$  NMR ( $\text{CD}_2\text{Cl}_2$ ):  $\delta$  -122.9 (m, 1F), -340.67 (br s, 1F);  $^{13}\text{C}$  NMR ( $\text{CD}_2\text{Cl}_2$ ):  $\delta$  164.71, 163.88, 161.75 (d,  $J = 238$  Hz), 157.34, 153.44, 153.05, 148.49 (d,  $J = 3$  Hz), 146.60, 135.80 (d,  $J = 5$  Hz), 124.27, 124.11, 119.66, 118.59, 113.54 (d,  $J = 19$  Hz), 36.13, 35.98, 30.72, 30.47.

**Complex 2a** is extremely hygroscopic, and even after extensive drying under vacuum,  $^1\text{H}$  NMR spectroscopic analysis in dry  $\text{CD}_2\text{Cl}_2$  showed the presence of 0.60 equiv of  $\text{H}_2\text{O}/\text{complex}$  (observed as a broad resonance at 1.42 ppm). The microanalysis results are consistent with this stoichiometry. Anal. Calc. for  $\text{C}_{24}\text{H}_{28}\text{F}_2\text{N}_2\text{Pd}\cdot 0.60 \text{H}_2\text{O}$ : C, 57.68, H, 5.77, N, 5.61; Found: C, 57.89, H, 5.87, N, 5.31. Notably, traces ( $\sim 3\%$ ) of  $[(t\text{-Bu-bpy})\text{Pd}(\text{F})_2]$  were observed in the  $^1\text{H}$ ,  $^{19}\text{F}$ , and  $^{13}\text{C}$  NMR spectra of most isolated samples of **2a**.

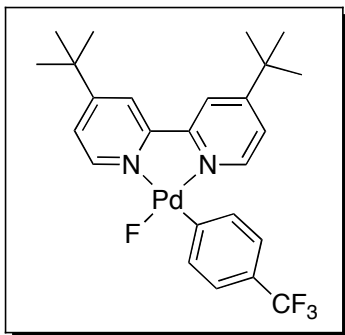

**Complex 2b** (0.39 g, 77% yield).  $^1\text{H}$  NMR ( $\text{CD}_2\text{Cl}_2$ ):  $\delta$  8.74 (d,  $J = 6$  Hz, 1H), 8.01 (multiple peaks, 3H), 7.64 (multiple peaks, 3H), 7.30 (multiple peaks, 3H), 1.45 (s, 9H), 1.39 (s, 9H);  $^{19}\text{F}$  NMR ( $\text{CD}_2\text{Cl}_2$ ):  $\delta$  -62.10 (s, 3F), -341.6 (s, 1F);  $^{13}\text{C}$  NMR ( $\text{CD}_2\text{Cl}_2$ ):  $\delta$  164.94, 164.17, 157.31, 153.45, 152.96, 148.44 (q,  $J = 4$  Hz), 136.84, 135.87 (q,  $J = 3$  Hz), 126.10 (q,  $J = 31$  Hz), 125.80 (q,  $J = 271$  Hz), 124.37, 124.11, 122.84 (q,  $J = 4$  Hz), 119.87, 118.77, 36.17, 36.02, 30.71, 30.46. Complex **2b** is extremely hygroscopic, and even after extensive drying under vacuum,  $^1\text{H}$  NMR spectroscopic analysis in dry  $\text{CD}_2\text{Cl}_2$  showed the presence of 0.67 equiv of  $\text{H}_2\text{O}/\text{complex}$  (observed as a broad resonance at 1.41 ppm). The microanalysis results are consistent with this stoichiometry. Anal. Calc. for  $\text{C}_{25}\text{H}_{28}\text{F}_4\text{N}_2\text{Pd}\cdot 0.67 \text{H}_2\text{O}$ : C, 54.42, H, 5.23, N, 5.07; Found: C, 54.28, H, 5.43, N, 5.05. Notably, trace amounts ( $\sim 4\%$ ) of  $[(t\text{-Bu-bpy})\text{Pd}(\text{F})_2]$  were observed in the  $^1\text{H}$ ,  $^{19}\text{F}$ , and  $^{13}\text{C}$  NMR spectra of most isolated samples of **2b**.

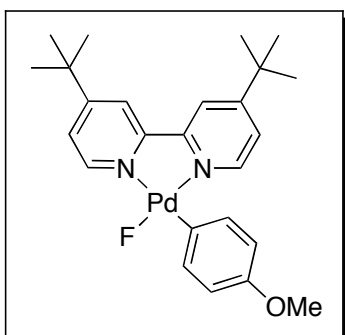

**Complex 2c** (0.21 g, 45% yield). Notably, trace amounts ( $\sim 6\%$ ) of  $[(t\text{-Bu-bpy})\text{Pd}(\text{F})_2]$  were observed in the  $^1\text{H}$ ,  $^{19}\text{F}$ , and  $^{13}\text{C}$  NMR spectra of most isolated samples of **2c**.  $^1\text{H}$  NMR ( $\text{CD}_2\text{Cl}_2$ ):  $\delta$  8.77 (d,  $J = 6$  Hz, 1H), 8.17 (d,  $J = 6$  Hz, 1H), 8.02 (d,  $J = 2$  Hz, 1H), 7.99 (d,  $J = 2$  Hz, 1H), 7.61 (dd,  $J = 4, 2$  Hz, 1H), 7.31 (d,  $J = 8$  Hz, 2H), 7.28 (d,  $J = 8, 2$  Hz, 1H), 6.72 (d,  $J = 8$  Hz, 2H), 3.77 (s, 3H), 1.44 (s, 9H), 1.38 (s, 9H);  $^{19}\text{F}$  NMR ( $\text{CD}_2\text{Cl}_2$ ):  $\delta$  -338.7 (s, 1F);  $^{13}\text{C}$  NMR ( $\text{CD}_2\text{Cl}_2$ ):  $\delta$  164.53, 163.65, 157.64, 157.30, 153.41, 153.18, 148.48, 135.86, 135.31, 124.17, 124.05, 119.57, 118.52, 113.06, 55.63, 36.10, 35.94, 30.72, 30.47. Complex **2c** is extremely hygroscopic, and even after extensive drying under vacuum,  $^1\text{H}$  NMR spectroscopic analysis in dry  $\text{CD}_2\text{Cl}_2$  showed the presence of 0.86 equiv of  $\text{H}_2\text{O}/\text{complex}$  (observed as a broad resonance at 1.41 ppm). The microanalysis results are consistent with this stoichiometry. Anal. Calc. for  $\text{C}_{25}\text{H}_{31}\text{FN}_2\text{OPd}\cdot 0.86 \text{H}_2\text{O}$ : C, 58.26, H, 6.23, N, 5.44; Found: C, 58.02, H, 6.18, N, 5.29. Notably, trace amounts ( $\sim 4\%$ ) of  $[(t\text{-Bu-bpy})\text{Pd}(\text{F})_2]$  were observed in the  $^1\text{H}$ ,  $^{19}\text{F}$ , and  $^{13}\text{C}$  NMR spectra of most isolated samples of **2b**.

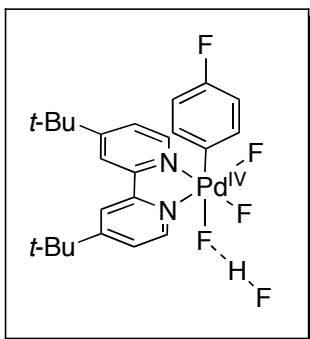

**Complex 5a**. In a glovebox, **2a** (10 mg, 0.02 mmol, 1 equiv) was dissolved in nitrobenzene (1 mL) and added to a 4 mL scintillation vial containing  $\text{XeF}_2$  (10 mg, 0.06 mmol, 3 equiv). The vial was sealed with a Teflon-lined cap and stirred for 25  $^\circ\text{C}$  for 10 s to yield an orange solution. The reaction mixture was then stirred at 80  $^\circ\text{C}$  for 2 min to afford a yellow solution. Hexanes (10 mL) was added to precipitate the crude inorganic product. The resulting yellow solid was collected, washed with hexanes (3 x 2 mL), and dried *in vacuo* to yield the crude product. This material was further purified by recrystallization from THF/hexanes and was obtained as a pale yellow solid (4.1 mg,

38% yield). The microanalysis results were consistently slightly low in carbon, which is likely due to traces of H<sub>2</sub>O (see above for a discussion of the hygroscopicity of **2-c**). Anal. Calc. for C<sub>24</sub>H<sub>29</sub>F<sub>5</sub>N<sub>2</sub>Pd: C, 52.71, H, 5.34, N, 5.12; Found: C, 51.99, H, 5.56, N, 5.30. Characterization by NMR spectroscopy is reported in *d*<sub>5</sub>-nitrobenzene and CD<sub>2</sub>Cl<sub>2</sub>, and low temperature NMR experiments were carried out in CD<sub>2</sub>Cl<sub>2</sub> (due to the high freezing point of nitrobenzene). However, it is to be noted that **5a** shows significant reactivity with CD<sub>2</sub>Cl<sub>2</sub> at room temperature; therefore, some impurities were observed in the spectra in CD<sub>2</sub>Cl<sub>2</sub>, and these grew in as the samples were allowed to stand for longer times.<sup>8</sup> <sup>1</sup>H NMR (*d*<sub>5</sub>-nitrobenzene): δ 9.48 (d, *J* = 6 Hz, 2H), 8.76 (s, 2H), 8.03 (d, 6Hz, 2H), 7.58 (m, 2H), 6.88 (m, 2H), 1.42 (s, 18H); <sup>19</sup>F NMR (*d*<sub>5</sub>-nitrobenzene): δ -116.7 (m, 1F), -204.8 (br. s, 1F, Pd-F *trans* from C), -253.2 (br s, 2F, Pd-F *trans* to N). A minor impurity with <sup>19</sup>F NMR resonances at δ -116.6 and -247 ppm proved extremely challenging to remove completely from samples of **5a**. <sup>1</sup>H NMR (CD<sub>2</sub>Cl<sub>2</sub>, 22 °C): δ 12.86 (br s, 1H), 8.96 (d, *J* = 6 Hz, 2H), 8.19 (s, 2H), 7.83 (d, *J* = 6 Hz, 2H), 6.89 (m, 2H), 6.82 (m, 2H), 1.48 (s, 18H); <sup>19</sup>F NMR (CD<sub>2</sub>Cl<sub>2</sub>, 22 °C): δ -117.2 (br s, 1F), -206.3 (m, 1F, Pd-F *trans* to Ar), -257.4 (br s, 2F, Pd-F *trans* to N); <sup>1</sup>H NMR (CD<sub>2</sub>Cl<sub>2</sub>, -70 °C): δ 12.71 (dd, *J* = 370, 31 Hz, 1H, Pd-FHF), 8.96 (br s, 2H), 8.10 (br s, 2H), 7.84 (br s, 2H), 6.83 (m, 4H), 1.41 (s, 18H); <sup>19</sup>F NMR (CD<sub>2</sub>Cl<sub>2</sub>, -70 °C): δ -116.7 (m, 1F), -177.6 (dd, *J* = 364, 116 Hz, 1F, Pd-FHF), -204.5 (m, 1F, Pd-FHF), -256.9 (d, *J* = 60 Hz, 2F, *trans* to N).

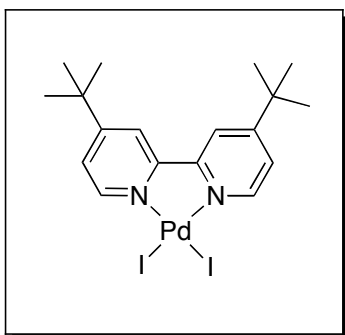

(*t*-Bu-bpy)Pd(I)<sub>2</sub>.<sup>6</sup> Using standard air-free techniques, (*t*-Bu-bpy)PdCl<sub>2</sub> (500 mg, 1.1 mmol, 1 equiv) was dissolved in acetone (15 mL). NaI (0.49 g, 3.0 mmol, 2.7 equiv) was added, and the reaction mixture was stirred for 2 h. The resulting purple precipitate was collected on a frit and washed with copious amounts of acetone (~50 mL).<sup>7</sup> The crude product was then dissolved in CH<sub>2</sub>Cl<sub>2</sub> (20 mL) and stirred with charcoal for 30 min. This suspension was filtered through a plug of Celite and washed with CH<sub>2</sub>Cl<sub>2</sub> (20 mL). The solvent was removed *in vacuo* to afford the product as a purple solid (0.64 g, 91% yield). <sup>1</sup>H NMR (CDCl<sub>3</sub>): δ 9.89 (d, *J* = 6 Hz, 2H), 7.93 (d, *J* = 2 Hz, 2H), 7.53 (dd, *J* = 6, 2 Hz, 2H), 1.45 (s, 9H); <sup>13</sup>C NMR (CDCl<sub>3</sub>): δ 164.00, 156.28, 153.77, 124.39, 119.00, 35.68, 30.28. Anal. Calc. for C<sub>18</sub>H<sub>24</sub>I<sub>2</sub>N<sub>2</sub>Pd: C, 34.39, H, 3.85, N, 4.46; Found: C, 34.49, H, 3.77, N, 4.49.

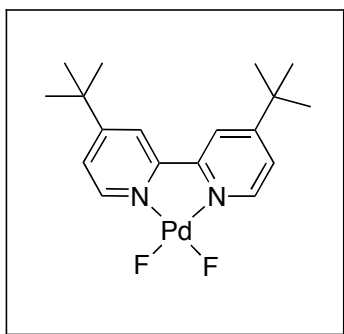

(*t*-Bu-bpy)Pd(F)<sub>2</sub>. Using a modification of Vigalok's procedure,<sup>7</sup> (*t*-Bu-bpy)Pd(I)<sub>2</sub> (90 mg, 0.14 mmol, 1.0 equiv) and AgF (50 mg, 0.42 mmol, 3.0 equiv) were weighed into a 20 mL scintillation vial and dissolved in CH<sub>2</sub>Cl<sub>2</sub> (4 mL). The vial was covered in aluminum foil, and the mixture was stirred for 3 h at room temperature. The resulting suspension was filtered through a plug of Celite, concentrated, and the product was precipitated with pentane. This solid was collected and washed with pentane (3 x 2 mL). It was then redissolved in CH<sub>2</sub>Cl<sub>2</sub> (2 mL), and

the suspension was filtered through a plug of Celite. The solvent was removed *in vacuo*, to yield the product as a pale yellow solid (20 mg, 35% yield).  $^1\text{H}$  NMR ( $\text{CD}_2\text{Cl}_2$ ):  $\delta$  8.51 (d,  $J = 6$  Hz, 2H), 7.88 (s, 2H), 7.54 (d,  $J = 6$  Hz, 2H), 1.42 (s, 18H);  $^{19}\text{F}$  NMR ( $\text{CD}_2\text{Cl}_2$ ):  $\delta$  -354.06 (s, 2F);  $^{13}\text{C}$  NMR ( $\text{CD}_2\text{Cl}_2$ ):  $\delta$  165.95, 156.05, 149.49, 124.19, 119.46, 36.37, 30.59. Complex **6** is extremely hygroscopic, and even after extensive drying under vacuum,  $^1\text{H}$  NMR spectroscopic analysis in dry  $\text{CD}_2\text{Cl}_2$  showed the presence of 0.86 equiv of  $\text{H}_2\text{O}/\text{complex}$  (observed as a broad resonance at 1.45 ppm). The microanalysis results are consistent with this stoichiometry. Anal. Calc. for  $\text{C}_{18}\text{H}_{24}\text{F}_2\text{N}_2\text{Pd}\cdot 0.86 \text{H}_2\text{O}$ : C, 50.47, H, 5.85, N, 6.54; Found: C, 50.70, H, 5.92, N, 6.41.

General procedure for oxidative fluorination of **2a-2c**. In a glovebox, the  $\text{Pd}^{\text{II}}$  fluoride (**2a-2c**) (10 mg, 1 equiv) was dissolved in nitrobenzene (1 mL). This solution was added to a 4 mL scintillation vial containing  $\text{XeF}_2$  (3 equiv). The vial was sealed with a Teflon-lined cap, vigorously shaken, and then heated at  $90^\circ\text{C}$  for 1 h. The resulting mixture was cooled to room temperature, hexafluorobenzene was added as an internal standard, and the reactions were analyzed by  $^{19}\text{F}$  NMR spectroscopy. The identities of the organic products were confirmed by the synthesis of authentic samples of these materials.

*It is important to note that the optimal conditions for  $^{19}\text{F}$  NMR spectroscopic analysis of these reactions were as follows: spectral width = -80 to -180 ppm, relaxation delay = 5 s, and acquisition time = 6.4 s. These conditions were required due to the faster relaxation time of the standard relative to the fluoroarene products.*

Studies of the reactivity of **5a**. In a glovebox, **5a** (1 equiv) was dissolved in nitrobenzene (0.012 M solution). Hexafluorobenzene was added as an internal standard, the NMR tube was sealed with a Teflon-lined cap, and the reaction mixture was shaken vigorously. This reaction was then analyzed by  $^{19}\text{F}$  NMR spectroscopy to determine the ratio of starting material to standard. The NMR tube was returned to the glovebox, and the oxidant (3 equiv) was added as a solid. The tube was shaken vigorously, removed from the glovebox, and heated in an oil bath at  $80^\circ\text{C}$  for 1 h. After cooling, the reaction was again analyzed by  $^{19}\text{F}$  NMR to determine the percent conversion of the starting material to the product.

**Table S1:** Reactivity of **5a** with Electrophilic Oxidants

| Entry | Oxidant                                                                           | Yield <b>3a</b>  |
|-------|-----------------------------------------------------------------------------------|------------------|
| 1     | XeF <sub>2</sub>                                                                  | 92%              |
| 2     | (PhSO <sub>2</sub> ) <sub>2</sub> NF                                              | 83%              |
| 3     | 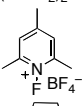 | 50%              |
| 4     |  | ≈95%             |
| 5     | PhICl <sub>2</sub>                                                                | 65% <sup>a</sup> |
| 6     | PhI(OAc) <sub>2</sub>                                                             | 9% <sup>b</sup>  |

<sup>a</sup>18% of 1-chloro-4-fluorobenzene was also formed.

<sup>b</sup>87% of 1-acetoxy-4-fluorobenzene was formed.

**Figure S1:**  $^{19}\text{F}$  NMR spectrum of **5a** in  $d^5$ -nitrobenzene.

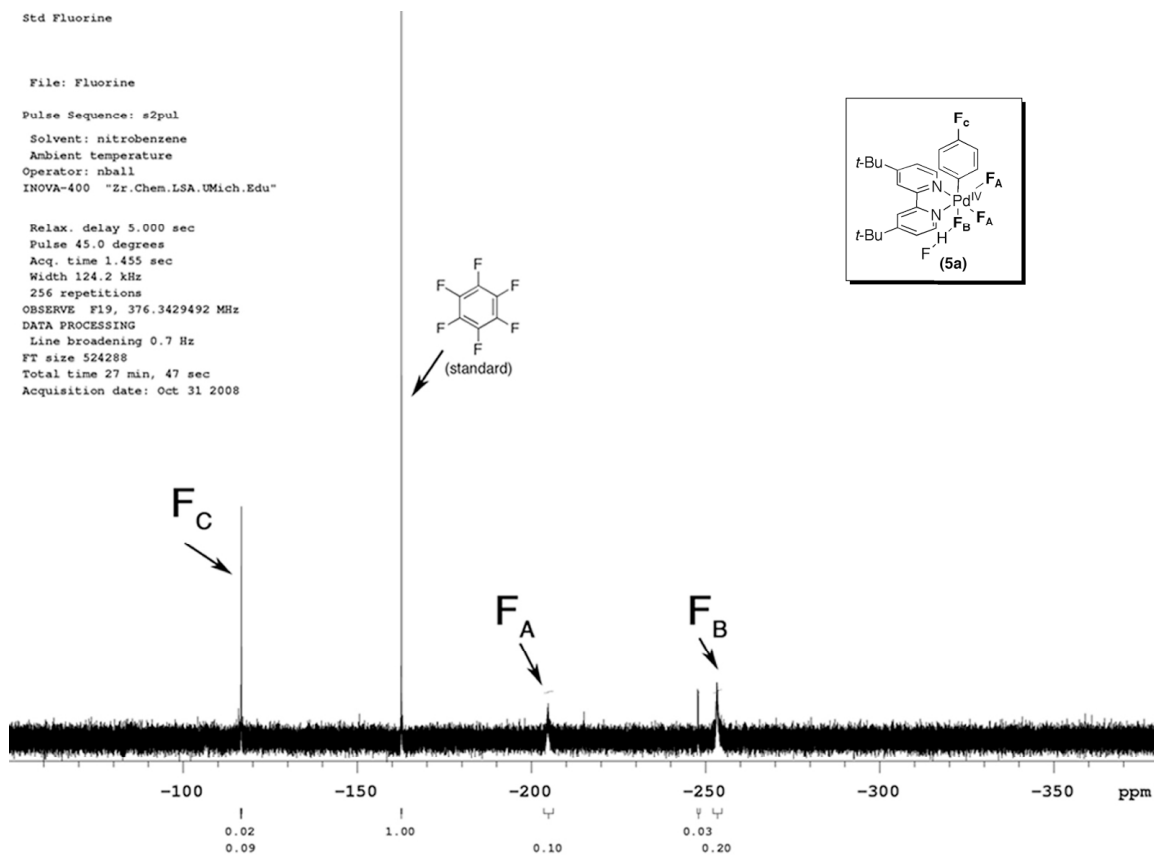



**Figure S2:**  $^1\text{H}$  NMR spectrum of **5a** in  $d^5$ -nitrobenzene.

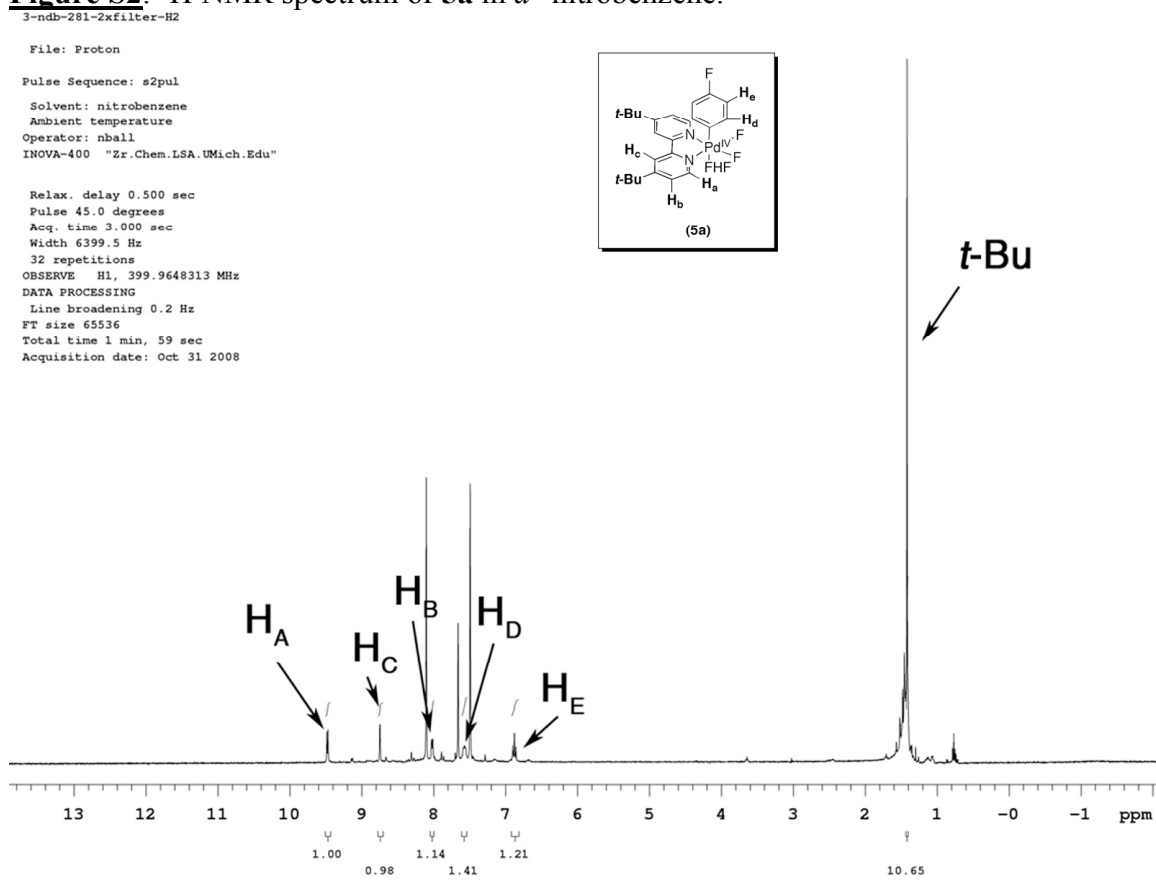

**Figure S3:** ORTEP drawing of **2a**.

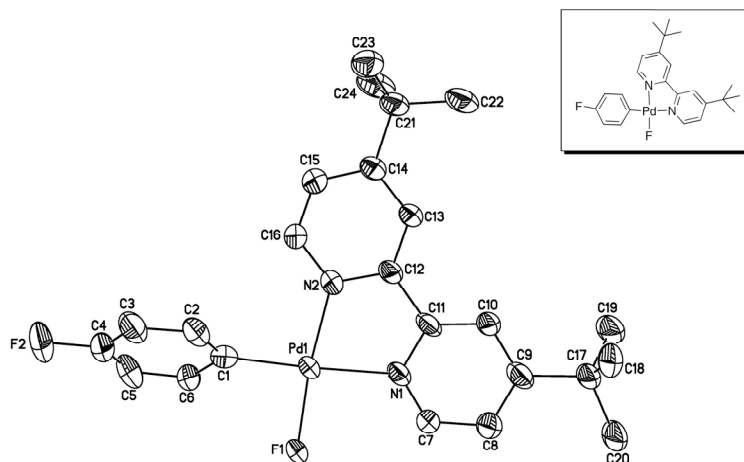

**Figure S4:** ORTEP drawing of **5a**.

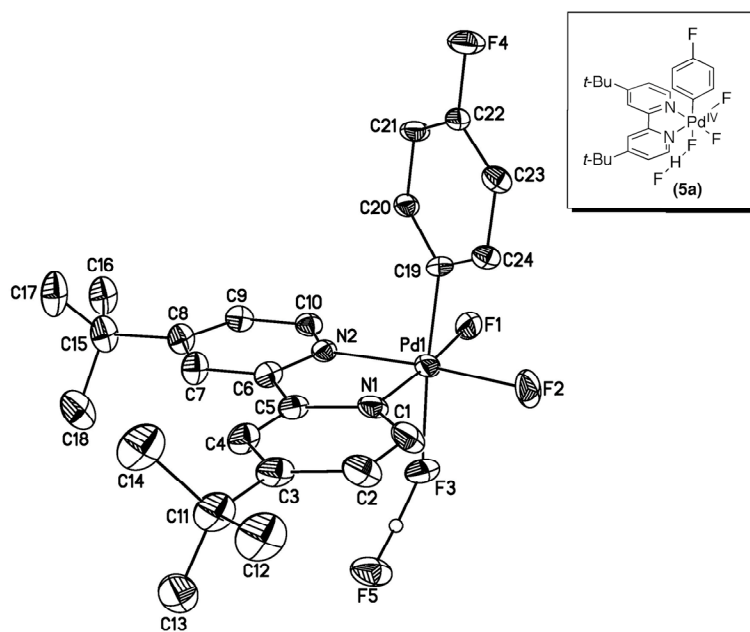

## References

- <sup>1</sup> For further information on using this method to reference NMR spectra, refer to the following website: [www.iupac.org/publications/pac/2001/7311/7311x1795.html](http://www.iupac.org/publications/pac/2001/7311/7311x1795.html).
- <sup>2</sup> Hoyer, T. R.; Eklov, B. M.; Ryba, T. D.; Voloshin, M.; Yao, L. *Org. Lett.* **2004**, *6*, 953-956.
- <sup>3</sup> Takahashi, Y.; Ito, S. S.; Sukai, S.; Ishii, Y. *J. Chem. Soc. Dalton Trans.* **1970**, *17*, 1065-1066.
- <sup>4</sup> Foley, S. R.; Han, S.; Qadeer, U. A.; Jordan, R. F. *Organometallics* **2004**, *23*, 600-609.
- <sup>5</sup> Wright, S. W.; Hageman, D. L.; McClure, L. D. *J. Org. Chem.* **1994**, *59*, 6095-6097.
- <sup>6</sup> Fryzuk, M. D.; Lloyd, B. R.; Clentsmith, G. K. B.; Rettig, S. J. *J. Am. Chem. Soc.* **1994**, *116*, 3804-3812.
- <sup>7</sup> (a) Yahav, A.; Goldberg, I.; Vigalok, A. *J. Am. Chem. Soc.* **2003**, *125*, 13634-13635. (b) Yahav, A.; Goldberg, I.; Vigalok, A. *Inorg. Chem.* **2005**, *44*, 1547.
- <sup>8</sup> Jasim, N. A.; Perutz R. N. *J. Am. Chem. Soc.*, **2000**, *122*, 8685.

### Structure Determination of Complex 2a

Yellow, blade-like crystals of **2a** were grown from a fluorobenzene/pentane solution at -30 deg. C. A crystal of dimensions 0.25 x 0.10 x 0.09 mm was mounted on a Bruker SMART APEX CCD-based X-ray diffractometer equipped with a low temperature device and fine focus Mo-target X-ray tube ( $\lambda = 0.71073$  Å) operated at 1500 W power (50 kV, 30 mA). The X-ray intensities were measured at 85(1) K; the detector was placed at a distance 5.055 cm from the crystal. A total of 3365 frames were collected with a scan width of  $0.5^\circ$  in  $\omega$  and  $0.45^\circ$  in  $\phi$  with an exposure time of 60 s/frame. The integration of the data yielded a total of 70232 reflections to a maximum  $2\theta$  value of  $50.10^\circ$  of which 11189 were independent and 9308 were greater than  $2\sigma(I)$ . The final cell constants (Table 1) were based on the xyz centroids of 9918 reflections above  $10\sigma(I)$ . Analysis of the data showed negligible decay during data collection; the data were processed with SADABS and corrected for absorption. The structure was solved and refined with the Bruker SHELXTL (version 6.12) software package, using the space group Ia with  $Z = 4$  for the formula  $2(C_{24}H_{28}N_2F_2Pd)$ ,  $3(C_6H_6)_{0.5}$ . There are two crystallographically independent molecules in the asymmetric unit. All non-hydrogen atoms were refined anisotropically with the hydrogen atoms placed in idealized positions. Full matrix least-squares refinement based on  $F^2$  converged at  $R1 = 0.0552$  and  $wR2 = 0.1553$  [based on  $I > 2\sigma(I)$ ],  $R1 = 0.0700$  and  $wR2 = 0.1651$  for all data. Additional details are presented in Table 1 and are given as Supporting Information in a CIF file.

Sheldrick, G.M. SHELXTL, v. 6.12; Bruker Analytical X-ray, Madison, WI, 2001.  
Sheldrick, G.M. SADABS, v. 2007/4. Program for Empirical Absorption Correction of Area Detector Data, University of Gottingen: Gottingen, Germany, 2007.  
Saint Plus, v. 7.34, Bruker Analytical X-ray, Madison, WI, 2006

**Table S2.** Crystal data and structure refinement for **2a**.

|                             |                                                                                    |
|-----------------------------|------------------------------------------------------------------------------------|
| Identification code         | <b>2a</b>                                                                          |
| Empirical formula           | C <sub>57</sub> H <sub>65</sub> F <sub>4</sub> N <sub>4</sub> Pd <sub>2</sub>      |
| Formula weight              | 1094.93                                                                            |
| Temperature                 | 85(2) K                                                                            |
| Wavelength                  | 0.71073 Å                                                                          |
| Crystal system, space group | Monoclinic, Ia                                                                     |
| Unit cell dimensions        | a = 17.9592(12) Å    alpha = 90 deg.<br>b = 17.5332(12) Å    beta = 95.135(1) deg. |

c = 20.2950(14) Å    gamma = 90 deg.

|                                   |                                             |
|-----------------------------------|---------------------------------------------|
| Volume                            | 6364.9(8) Å <sup>3</sup>                    |
| Z, Calculated density             | 4, 1.143 Mg/m <sup>3</sup>                  |
| Absorption coefficient            | 0.610 mm <sup>-1</sup>                      |
| F(000)                            | 2252                                        |
| Crystal size                      | 0.25 x 0.10 x 0.09 mm                       |
| Theta range for data collection   | 2.28 to 25.05 deg.                          |
| Limiting indices                  | -21<=h<=21, -20<=k<=20, -24<=l<=24          |
| Reflections collected / unique    | 70232 / 11189 [R(int) = 0.0652]             |
| Completeness to theta = 25.05     | 99.8 %                                      |
| Absorption correction             | Semi-empirical from equivalents             |
| Max. and min. transmission        | 0.9472 and 0.8625                           |
| Refinement method                 | Full-matrix least-squares on F <sup>2</sup> |
| Data / restraints / parameters    | 11189 / 218 / 682                           |
| Goodness-of-fit on F <sup>2</sup> | 1.135                                       |
| Final R indices [I>2sigma(I)]     | R1 = 0.0552, wR2 = 0.1553                   |
| R indices (all data)              | R1 = 0.0700, wR2 = 0.1651                   |
| Absolute structure parameter      | -0.01(4)                                    |
| Largest diff. peak and hole       | 0.805 and -0.469 e.Å <sup>-3</sup>          |

**Table S3.** Atomic coordinates ( x 10<sup>4</sup>) and equivalent isotropic displacement parameters (Å<sup>2</sup> x 10<sup>3</sup>) for nb96.

U(eq) is defined as one third of the trace of the orthogonalized Uij tensor.

|       | x       | y       | z       | U(eq)  |
|-------|---------|---------|---------|--------|
| Pd(1) | 6312(1) | 8562(1) | 4325(1) | 38(1)  |
| Pd(2) | 4128(1) | 1052(1) | 1788(1) | 37(1)  |
| F(1)  | 7409(2) | 8351(3) | 4456(2) | 45(1)  |
| F(2)  | 6265(4) | 8562(6) | 7326(3) | 113(3) |
| F(3)  | 4192(3) | -77(2)  | 1803(2) | 44(1)  |
| F(4)  | 4956(3) | 948(3)  | 4782(2) | 64(2)  |
| N(1)  | 6304(4) | 8661(4) | 3300(3) | 39(2)  |
| N(2)  | 5211(4) | 8765(4) | 4081(3) | 44(2)  |
| N(3)  | 3975(3) | 2169(4) | 1633(3) | 40(1)  |
| N(4)  | 3754(4) | 1053(4) | 792(3)  | 38(2)  |
| C(1)  | 6264(5) | 8563(5) | 5297(4) | 44(2)  |
| C(2)  | 5997(5) | 9189(7) | 5634(4) | 65(3)  |
| C(3)  | 6004(6) | 9156(9) | 6316(5) | 91(5)  |
| C(4)  | 6269(6) | 8578(8) | 6656(4) | 76(4)  |
| C(5)  | 6546(6) | 7960(7) | 6360(4) | 74(3)  |

|       |          |          |          |       |
|-------|----------|----------|----------|-------|
| C(6)  | 6565(5)  | 7956(6)  | 5679(4)  | 50(2) |
| C(7)  | 6885(5)  | 8627(5)  | 2962(4)  | 43(2) |
| C(8)  | 6873(5)  | 8855(6)  | 2294(4)  | 49(2) |
| C(9)  | 6204(5)  | 9114(5)  | 1983(4)  | 45(2) |
| C(10) | 5584(4)  | 9137(5)  | 2344(3)  | 42(2) |
| C(11) | 5649(4)  | 8901(5)  | 2989(4)  | 40(2) |
| C(12) | 5021(4)  | 8905(5)  | 3422(3)  | 39(2) |
| C(13) | 4281(4)  | 9019(4)  | 3199(3)  | 39(2) |
| C(14) | 3709(4)  | 8975(5)  | 3620(4)  | 43(2) |
| C(15) | 3930(5)  | 8839(5)  | 4275(4)  | 47(2) |
| C(16) | 4661(5)  | 8735(6)  | 4489(4)  | 51(2) |
| C(17) | 6149(4)  | 9416(6)  | 1271(4)  | 51(2) |
| C(18) | 5954(5)  | 10279(6) | 1282(4)  | 60(2) |
| C(19) | 5511(5)  | 8970(7)  | 861(4)   | 64(3) |
| C(20) | 6875(5)  | 9311(7)  | 952(4)   | 64(3) |
| C(21) | 2879(4)  | 9089(5)  | 3382(4)  | 47(2) |
| C(22) | 2792(5)  | 9346(7)  | 2653(5)  | 64(3) |
| C(23) | 2546(5)  | 9718(5)  | 3781(4)  | 49(2) |
| C(24) | 2489(5)  | 8354(7)  | 3479(6)  | 70(3) |
| C(25) | 4448(5)  | 1101(4)  | 2748(4)  | 37(2) |
| C(26) | 3955(5)  | 1347(5)  | 3205(4)  | 48(2) |
| C(27) | 4102(5)  | 1302(6)  | 3882(4)  | 50(2) |
| C(28) | 4797(5)  | 1026(5)  | 4116(4)  | 48(2) |
| C(29) | 5317(5)  | 813(6)   | 3700(4)  | 53(2) |
| C(30) | 5153(4)  | 848(5)   | 3004(4)  | 46(2) |
| C(31) | 4150(4)  | 2724(5)  | 2083(3)  | 42(2) |
| C(32) | 4010(5)  | 3488(5)  | 1932(4)  | 45(2) |
| C(33) | 3680(4)  | 3712(5)  | 1314(4)  | 41(2) |
| C(34) | 3498(4)  | 3127(5)  | 867(3)   | 39(2) |
| C(35) | 3648(4)  | 2377(5)  | 1023(3)  | 36(2) |
| C(36) | 3507(4)  | 1720(5)  | 559(4)   | 41(2) |
| C(37) | 3133(4)  | 1810(5)  | -70(3)   | 39(2) |
| C(38) | 3032(4)  | 1161(5)  | -471(4)  | 44(2) |
| C(39) | 3304(4)  | 468(5)   | -224(4)  | 46(2) |
| C(40) | 3661(5)  | 429(5)   | 421(4)   | 45(2) |
| C(41) | 3534(5)  | 4551(5)  | 1172(4)  | 47(2) |
| C(42) | 4297(6)  | 4959(6)  | 1197(5)  | 63(2) |
| C(43) | 3048(6)  | 4886(6)  | 1681(4)  | 68(3) |
| C(44) | 3151(6)  | 4682(6)  | 459(4)   | 68(3) |
| C(45) | 2570(5)  | 1226(5)  | -1156(4) | 46(2) |
| C(46) | 1775(5)  | 1467(6)  | -1026(4) | 55(2) |
| C(47) | 2935(6)  | 1824(6)  | -1562(4) | 60(2) |
| C(48) | 2515(6)  | 472(6)   | -1525(4) | 65(3) |
| C(49) | 4728(11) | 8164(12) | 9045(10) | 84(4) |
| C(50) | 4771(12) | 8142(13) | 8376(11) | 88(4) |
| C(51) | 4162(13) | 8327(13) | 7960(11) | 93(4) |

|       |          |          |          |        |
|-------|----------|----------|----------|--------|
| C(52) | 3527(12) | 8531(11) | 8185(11) | 85(4)  |
| C(53) | 3475(11) | 8502(11) | 8838(11) | 81(4)  |
| C(54) | 4057(10) | 8316(9)  | 9299(8)  | 81(4)  |
| C(55) | 1433(10) | 6288(9)  | 1932(8)  | 108(5) |
| C(56) | 1371(15) | 6965(12) | 2264(12) | 108(5) |
| C(57) | 1085(13) | 7600(12) | 1926(12) | 99(5)  |
| C(58) | 782(10)  | 7625(11) | 1324(11) | 85(4)  |
| C(59) | 785(11)  | 6955(11) | 1013(10) | 89(4)  |
| C(60) | 1129(14) | 6302(12) | 1277(10) | 98(5)  |
| C(61) | 69(18)   | 6250(20) | 4123(18) | 174(9) |
| C(62) | 381(17)  | 6820(17) | 3781(19) | 169(9) |
| C(63) | 726(18)  | 6610(19) | 3236(18) | 166(9) |
| C(64) | 863(16)  | 5910(20) | 3070(17) | 167(9) |
| C(65) | 455(17)  | 5356(17) | 3328(19) | 168(9) |
| C(66) | 161(18)  | 5499(19) | 3928(19) | 173(9) |

---

**Table S4.** Bond lengths [Å] and angles [deg] for **2a**.

---

|             |           |
|-------------|-----------|
| Pd(1)-C(1)  | 1.981(8)  |
| Pd(1)-F(1)  | 1.999(4)  |
| Pd(1)-N(2)  | 2.026(6)  |
| Pd(1)-N(1)  | 2.086(7)  |
| Pd(2)-C(25) | 1.983(9)  |
| Pd(2)-F(3)  | 1.983(4)  |
| Pd(2)-N(3)  | 1.998(7)  |
| Pd(2)-N(4)  | 2.073(7)  |
| F(2)-C(4)   | 1.360(11) |
| F(4)-C(28)  | 1.363(9)  |
| N(1)-C(7)   | 1.300(11) |
| N(1)-C(11)  | 1.351(10) |
| N(2)-C(16)  | 1.347(10) |
| N(2)-C(12)  | 1.372(9)  |
| N(3)-C(31)  | 1.353(10) |
| N(3)-C(35)  | 1.370(9)  |
| N(4)-C(36)  | 1.323(11) |
| N(4)-C(40)  | 1.331(11) |
| C(1)-C(6)   | 1.397(11) |
| C(1)-C(2)   | 1.400(13) |
| C(2)-C(3)   | 1.384(12) |
| C(3)-C(4)   | 1.294(15) |
| C(4)-C(5)   | 1.354(14) |
| C(5)-C(6)   | 1.386(11) |
| C(7)-C(8)   | 1.412(11) |
| C(8)-C(9)   | 1.382(12) |
| C(9)-C(10)  | 1.388(11) |
| C(9)-C(17)  | 1.534(11) |
| C(10)-C(11) | 1.367(11) |
| C(11)-C(12) | 1.492(11) |
| C(12)-C(13) | 1.380(10) |
| C(13)-C(14) | 1.396(11) |
| C(14)-C(15) | 1.372(11) |
| C(14)-C(21) | 1.540(10) |
| C(15)-C(16) | 1.358(12) |
| C(17)-C(20) | 1.519(12) |
| C(17)-C(18) | 1.553(14) |
| C(17)-C(19) | 1.563(13) |
| C(21)-C(24) | 1.487(14) |
| C(21)-C(23) | 1.521(12) |
| C(21)-C(22) | 1.541(12) |
| C(25)-C(30) | 1.397(12) |



|                 |           |
|-----------------|-----------|
| C(25)-C(26)     | 1.407(12) |
| C(26)-C(27)     | 1.377(12) |
| C(27)-C(28)     | 1.381(12) |
| C(28)-C(29)     | 1.367(12) |
| C(29)-C(30)     | 1.418(11) |
| C(31)-C(32)     | 1.392(12) |
| C(32)-C(33)     | 1.395(11) |
| C(33)-C(34)     | 1.389(11) |
| C(33)-C(41)     | 1.518(12) |
| C(34)-C(35)     | 1.374(11) |
| C(35)-C(36)     | 1.497(11) |
| C(36)-C(37)     | 1.397(10) |
| C(37)-C(38)     | 1.401(12) |
| C(38)-C(39)     | 1.388(12) |
| C(38)-C(45)     | 1.558(11) |
| C(39)-C(40)     | 1.407(11) |
| C(41)-C(43)     | 1.528(13) |
| C(41)-C(42)     | 1.542(12) |
| C(41)-C(44)     | 1.562(11) |
| C(45)-C(47)     | 1.518(13) |
| C(45)-C(48)     | 1.519(13) |
| C(45)-C(46)     | 1.534(13) |
| C(49)-C(50)     | 1.366(18) |
| C(49)-C(54)     | 1.379(18) |
| C(50)-C(51)     | 1.360(19) |
| C(51)-C(52)     | 1.32(2)   |
| C(52)-C(53)     | 1.338(19) |
| C(53)-C(54)     | 1.378(18) |
| C(55)-C(56)     | 1.375(18) |
| C(55)-C(60)     | 1.392(18) |
| C(56)-C(57)     | 1.382(19) |
| C(57)-C(58)     | 1.293(19) |
| C(58)-C(59)     | 1.334(18) |
| C(59)-C(60)     | 1.387(18) |
| C(61)-C(62)     | 1.37(2)   |
| C(61)-C(66)     | 1.384(19) |
| C(62)-C(63)     | 1.37(2)   |
| C(63)-C(64)     | 1.31(2)   |
| C(64)-C(65)     | 1.35(2)   |
| C(65)-C(66)     | 1.393(19) |
| C(1)-Pd(1)-F(1) | 89.9(3)   |
| C(1)-Pd(1)-N(2) | 96.6(3)   |
| F(1)-Pd(1)-N(2) | 173.5(2)  |
| C(1)-Pd(1)-N(1) | 174.3(3)  |
| F(1)-Pd(1)-N(1) | 93.8(2)   |

|                   |           |
|-------------------|-----------|
| N(2)-Pd(1)-N(1)   | 79.7(3)   |
| C(25)-Pd(2)-F(3)  | 90.9(3)   |
| C(25)-Pd(2)-N(3)  | 97.9(3)   |
| F(3)-Pd(2)-N(3)   | 171.0(2)  |
| C(25)-Pd(2)-N(4)  | 176.8(3)  |
| F(3)-Pd(2)-N(4)   | 91.6(2)   |
| N(3)-Pd(2)-N(4)   | 79.5(2)   |
| C(7)-N(1)-C(11)   | 118.2(7)  |
| C(7)-N(1)-Pd(1)   | 126.0(6)  |
| C(11)-N(1)-Pd(1)  | 114.8(5)  |
| C(16)-N(2)-C(12)  | 118.3(6)  |
| C(16)-N(2)-Pd(1)  | 126.6(5)  |
| C(12)-N(2)-Pd(1)  | 115.0(5)  |
| C(31)-N(3)-C(35)  | 118.2(7)  |
| C(31)-N(3)-Pd(2)  | 125.3(5)  |
| C(35)-N(3)-Pd(2)  | 116.4(5)  |
| C(36)-N(4)-C(40)  | 120.2(7)  |
| C(36)-N(4)-Pd(2)  | 114.7(5)  |
| C(40)-N(4)-Pd(2)  | 124.4(6)  |
| C(6)-C(1)-C(2)    | 117.3(8)  |
| C(6)-C(1)-Pd(1)   | 120.2(6)  |
| C(2)-C(1)-Pd(1)   | 122.3(7)  |
| C(3)-C(2)-C(1)    | 118.9(10) |
| C(4)-C(3)-C(2)    | 122.4(10) |
| C(3)-C(4)-C(5)    | 121.4(9)  |
| C(3)-C(4)-F(2)    | 121.0(10) |
| C(5)-C(4)-F(2)    | 117.6(10) |
| C(4)-C(5)-C(6)    | 119.3(9)  |
| C(5)-C(6)-C(1)    | 120.5(9)  |
| N(1)-C(7)-C(8)    | 123.4(8)  |
| C(9)-C(8)-C(7)    | 118.0(8)  |
| C(8)-C(9)-C(10)   | 118.3(7)  |
| C(8)-C(9)-C(17)   | 121.6(8)  |
| C(10)-C(9)-C(17)  | 120.0(7)  |
| C(11)-C(10)-C(9)  | 119.5(7)  |
| N(1)-C(11)-C(10)  | 122.5(7)  |
| N(1)-C(11)-C(12)  | 113.5(7)  |
| C(10)-C(11)-C(12) | 123.9(7)  |
| N(2)-C(12)-C(13)  | 119.7(6)  |
| N(2)-C(12)-C(11)  | 115.9(6)  |
| C(13)-C(12)-C(11) | 124.4(6)  |
| C(12)-C(13)-C(14) | 122.0(7)  |
| C(15)-C(14)-C(13) | 116.0(7)  |
| C(15)-C(14)-C(21) | 121.0(7)  |
| C(13)-C(14)-C(21) | 123.0(7)  |
| C(16)-C(15)-C(14) | 121.4(7)  |

|                   |          |
|-------------------|----------|
| N(2)-C(16)-C(15)  | 122.6(7) |
| C(20)-C(17)-C(9)  | 112.0(7) |
| C(20)-C(17)-C(18) | 109.1(8) |
| C(9)-C(17)-C(18)  | 108.6(6) |
| C(20)-C(17)-C(19) | 109.2(7) |
| C(9)-C(17)-C(19)  | 108.1(8) |
| C(18)-C(17)-C(19) | 109.9(7) |
| C(24)-C(21)-C(23) | 110.2(8) |
| C(24)-C(21)-C(14) | 107.4(7) |
| C(23)-C(21)-C(14) | 110.0(6) |
| C(24)-C(21)-C(22) | 111.8(8) |
| C(23)-C(21)-C(22) | 106.8(8) |
| C(14)-C(21)-C(22) | 110.6(7) |
| C(30)-C(25)-C(26) | 117.1(8) |
| C(30)-C(25)-Pd(2) | 121.7(6) |
| C(26)-C(25)-Pd(2) | 121.1(6) |
| C(27)-C(26)-C(25) | 124.4(8) |
| C(26)-C(27)-C(28) | 116.7(8) |
| F(4)-C(28)-C(29)  | 119.4(8) |
| F(4)-C(28)-C(27)  | 118.6(7) |
| C(29)-C(28)-C(27) | 122.0(7) |
|                   |          |
| C(28)-C(29)-C(30) | 120.7(7) |
| C(25)-C(30)-C(29) | 119.0(7) |
| N(3)-C(31)-C(32)  | 121.1(7) |
| C(31)-C(32)-C(33) | 121.5(8) |
| C(34)-C(33)-C(32) | 115.9(7) |
| C(34)-C(33)-C(41) | 124.4(7) |
| C(32)-C(33)-C(41) | 119.7(7) |
| C(35)-C(34)-C(33) | 121.7(7) |
| N(3)-C(35)-C(34)  | 121.6(7) |
| N(3)-C(35)-C(36)  | 113.5(7) |
| C(34)-C(35)-C(36) | 124.9(6) |
| N(4)-C(36)-C(37)  | 123.0(8) |
| N(4)-C(36)-C(35)  | 115.0(6) |
| C(37)-C(36)-C(35) | 122.0(8) |
| C(36)-C(37)-C(38) | 117.8(8) |
| C(39)-C(38)-C(37) | 118.6(7) |
| C(39)-C(38)-C(45) | 121.9(7) |
| C(37)-C(38)-C(45) | 119.3(8) |
| C(38)-C(39)-C(40) | 119.7(8) |
| N(4)-C(40)-C(39)  | 120.7(8) |
| C(33)-C(41)-C(43) | 110.1(7) |
| C(33)-C(41)-C(42) | 107.8(7) |
| C(43)-C(41)-C(42) | 111.1(8) |
| C(33)-C(41)-C(44) | 111.8(7) |

|                   |           |
|-------------------|-----------|
| C(43)-C(41)-C(44) | 109.8(8)  |
| C(42)-C(41)-C(44) | 106.2(7)  |
| C(47)-C(45)-C(48) | 110.2(7)  |
| C(47)-C(45)-C(46) | 111.0(8)  |
| C(48)-C(45)-C(46) | 107.8(8)  |
| C(47)-C(45)-C(38) | 108.2(7)  |
| C(48)-C(45)-C(38) | 112.4(7)  |
| C(46)-C(45)-C(38) | 107.3(6)  |
| C(50)-C(49)-C(54) | 120.4(17) |
| C(51)-C(50)-C(49) | 119.8(19) |
| C(52)-C(51)-C(50) | 121.5(19) |
| C(51)-C(52)-C(53) | 118.2(19) |
| C(52)-C(53)-C(54) | 124.5(18) |
| C(53)-C(54)-C(49) | 115.2(16) |
| C(56)-C(55)-C(60) | 114.2(15) |
| C(55)-C(56)-C(57) | 119.7(18) |
| C(58)-C(57)-C(56) | 127.1(19) |
| C(57)-C(58)-C(59) | 113.4(18) |
| C(58)-C(59)-C(60) | 124.5(19) |
| C(59)-C(60)-C(55) | 120.5(17) |
| C(62)-C(61)-C(66) | 119(2)    |
| C(63)-C(62)-C(61) | 117(2)    |
| C(64)-C(63)-C(62) | 125(2)    |
| C(63)-C(64)-C(65) | 117(2)    |
| C(64)-C(65)-C(66) | 118(2)    |
| C(61)-C(66)-C(65) | 119(2)    |

---

Symmetry transformations used to generate equivalent atoms:

**Table S5.** Anisotropic displacement parameters ( $\text{\AA}^2 \times 10^3$ ) for **2a**.  
The anisotropic displacement factor exponent takes the form:  
 $-2 \pi^2 [ h^2 a^{*2} U_{11} + \dots + 2 h k a^* b^* U_{12} ]$

---

|       | U11   | U22     | U33   | U23   | U13    | U12   |
|-------|-------|---------|-------|-------|--------|-------|
| Pd(1) | 27(1) | 60(1)   | 25(1) | 3(1)  | -5(1)  | 2(1)  |
| Pd(2) | 27(1) | 56(1)   | 26(1) | 0(1)  | -4(1)  | 5(1)  |
| F(1)  | 31(2) | 76(3)   | 28(2) | 7(2)  | -6(2)  | 5(2)  |
| F(2)  | 84(5) | 222(10) | 30(3) | -9(4) | -14(3) | 31(5) |
| F(3)  | 42(2) | 58(3)   | 31(2) | 3(2)  | -7(2)  | 7(2)  |
| F(4)  | 66(3) | 97(4)   | 26(2) | -2(2) | -11(2) | 6(3)  |

|       |       |         |       |        |        |        |
|-------|-------|---------|-------|--------|--------|--------|
| N(1)  | 30(4) | 58(4)   | 28(3) | -5(3)  | -7(3)  | 2(3)   |
| N(2)  | 31(3) | 73(5)   | 29(3) | 8(3)   | -2(3)  | -1(3)  |
| N(3)  | 33(3) | 59(4)   | 25(3) | 5(3)   | -4(2)  | 2(3)   |
| N(4)  | 30(4) | 53(4)   | 29(3) | 0(3)   | 0(3)   | 1(3)   |
| C(1)  | 27(4) | 65(5)   | 41(4) | -1(4)  | 3(4)   | -1(4)  |
| C(2)  | 40(5) | 116(9)  | 36(4) | -5(5)  | -9(4)  | 14(5)  |
| C(3)  | 48(6) | 180(14) | 41(5) | -33(7) | -12(4) | 39(7)  |
| C(4)  | 45(5) | 153(11) | 30(4) | -2(6)  | -1(4)  | 23(6)  |
| C(5)  | 60(6) | 118(9)  | 40(5) | 11(5)  | -18(4) | 8(6)   |
| C(6)  | 38(4) | 80(6)   | 32(4) | 15(4)  | 1(3)   | 7(4)   |
| C(7)  | 30(4) | 68(5)   | 31(4) | 7(4)   | 1(3)   | 2(4)   |
| C(8)  | 38(5) | 77(6)   | 32(4) | -4(4)  | 4(3)   | 7(4)   |
| C(9)  | 36(4) | 63(5)   | 33(4) | -7(4)  | -9(3)  | 10(4)  |
| C(10) | 29(4) | 71(6)   | 25(4) | -6(3)  | -1(3)  | 1(3)   |
| C(11) | 28(4) | 59(5)   | 32(4) | -6(3)  | -10(3) | 10(3)  |
| C(12) | 27(4) | 62(5)   | 27(3) | -10(3) | -6(3)  | 0(3)   |
| C(13) | 28(4) | 57(5)   | 30(4) | -1(3)  | -4(3)  | 1(3)   |
| C(14) | 27(4) | 65(5)   | 35(4) | -4(4)  | -5(3)  | -4(4)  |
| C(15) | 33(4) | 73(6)   | 36(4) | 6(4)   | 5(3)   | -1(4)  |
| C(16) | 33(4) | 90(7)   | 29(4) | 6(4)   | 3(3)   | 4(4)   |
| C(17) | 33(4) | 95(7)   | 24(3) | 1(4)   | -1(3)  | 11(4)  |
| C(18) | 55(5) | 95(7)   | 28(4) | 10(4)  | 5(4)   | 7(5)   |
| C(19) | 44(5) | 114(9)  | 32(4) | -7(5)  | -5(4)  | 12(5)  |
| C(20) | 52(5) | 117(8)  | 23(4) | 0(4)   | 0(3)   | 15(5)  |
| C(21) | 25(4) | 72(6)   | 44(4) | -7(4)  | -5(3)  | -2(4)  |
| C(22) | 29(5) | 104(9)  | 54(6) | -8(5)  | -12(4) | 7(5)   |
| C(23) | 35(4) | 61(5)   | 52(5) | -3(4)  | 4(3)   | -4(4)  |
| C(24) | 33(5) | 83(7)   | 91(8) | 2(6)   | -12(5) | -3(5)  |
| C(25) | 32(5) | 43(5)   | 35(4) | 0(3)   | 1(4)   | -3(3)  |
| C(26) | 27(4) | 76(6)   | 40(4) | 7(4)   | -1(3)  | 10(4)  |
| C(27) | 33(4) | 79(6)   | 37(4) | -2(4)  | 6(4)   | -5(4)  |
| C(28) | 50(5) | 69(6)   | 25(4) | -2(4)  | -3(3)  | 3(4)   |
| C(29) | 32(4) | 88(7)   | 38(4) | -4(4)  | -10(3) | 6(4)   |
| C(30) | 27(4) | 76(6)   | 33(4) | -11(4) | -1(3)  | 4(4)   |
| C(31) | 38(4) | 60(5)   | 26(3) | -2(3)  | -4(3)  | -6(4)  |
| C(32) | 36(4) | 67(6)   | 31(4) | -4(3)  | 5(3)   | 1(4)   |
| C(33) | 31(4) | 59(5)   | 31(4) | 2(3)   | -2(3)  | 1(3)   |
| C(34) | 30(4) | 60(5)   | 24(3) | 0(3)   | -5(3)  | -2(3)  |
| C(35) | 24(3) | 60(5)   | 25(3) | 3(3)   | 1(3)   | 1(3)   |
| C(36) | 32(4) | 59(5)   | 32(4) | -4(4)  | 0(3)   | -10(4) |
| C(37) | 33(4) | 56(5)   | 27(3) | 3(3)   | -1(3)  | -7(3)  |
| C(38) | 33(4) | 73(6)   | 25(4) | -4(3)  | 3(3)   | -8(4)  |
| C(39) | 41(4) | 64(5)   | 31(4) | -5(4)  | -6(3)  | -3(4)  |
| C(40) | 44(5) | 60(5)   | 31(4) | -2(4)  | 2(3)   | 5(4)   |
| C(41) | 43(4) | 63(5)   | 33(4) | 7(4)   | -5(3)  | -2(4)  |
| C(42) | 66(6) | 65(6)   | 58(5) | -3(4)  | -3(4)  | -20(5) |

|       |        |         |         |         |         |        |
|-------|--------|---------|---------|---------|---------|--------|
| C(43) | 77(7)  | 76(7)   | 49(5)   | 5(5)    | -1(5)   | 2(6)   |
| C(44) | 74(7)  | 79(7)   | 47(5)   | 9(5)    | -15(5)  | -10(5) |
| C(45) | 47(5)  | 64(5)   | 27(4)   | 2(3)    | 5(3)    | -3(4)  |
| C(46) | 44(5)  | 84(7)   | 33(4)   | 3(4)    | -15(4)  | -6(4)  |
| C(47) | 73(7)  | 79(6)   | 28(4)   | 3(4)    | -1(4)   | 1(5)   |
| C(48) | 72(6)  | 91(7)   | 29(4)   | -6(4)   | -13(4)  | -4(5)  |
| C(49) | 82(8)  | 53(7)   | 113(10) | 4(8)    | -5(8)   | -9(7)  |
| C(50) | 86(8)  | 60(8)   | 116(10) | 8(8)    | -1(8)   | -13(7) |
| C(51) | 98(9)  | 59(8)   | 119(10) | 11(8)   | -11(8)  | -16(8) |
| C(52) | 88(9)  | 40(7)   | 122(10) | 12(8)   | -20(9)  | -15(7) |
| C(53) | 82(8)  | 32(7)   | 125(10) | 10(8)   | -9(8)   | -18(7) |
| C(54) | 85(9)  | 41(7)   | 116(10) | 9(8)    | -4(8)   | -4(7)  |
| C(55) | 76(9)  | 103(9)  | 145(12) | -40(9)  | 7(9)    | -25(8) |
| C(56) | 77(9)  | 107(10) | 139(11) | -45(9)  | 7(9)    | -25(9) |
| C(57) | 67(9)  | 98(9)   | 133(11) | -45(9)  | 26(8)   | -25(8) |
| C(58) | 42(7)  | 95(8)   | 125(11) | -33(9)  | 40(7)   | -36(7) |
| C(59) | 56(8)  | 100(9)  | 117(11) | -32(8)  | 34(8)   | -36(7) |
| C(60) | 73(9)  | 97(9)   | 128(11) | -42(9)  | 30(8)   | -28(8) |
| C(61) | 66(11) | 194(19) | 260(20) | 89(18)  | -3(12)  | 34(12) |
| C(62) | 58(11) | 189(18) | 250(20) | 88(18)  | -20(12) | 31(11) |
| C(63) | 63(12) | 188(18) | 240(20) | 93(18)  | -23(11) | 27(12) |
| C(64) | 66(11) | 189(19) | 240(20) | 98(18)  | -19(11) | 30(11) |
| C(65) | 71(12) | 186(18) | 240(20) | 104(18) | -9(12)  | 37(11) |
| C(66) | 73(12) | 189(18) | 260(20) | 94(19)  | 3(12)   | 35(12) |

---

**Table S6.** Hydrogen coordinates ( $\times 10^4$ ) and isotropic displacement parameters ( $\text{\AA}^2 \times 10^3$ ) for **2a**.

|        | x    | y     | z    | U(eq) |
|--------|------|-------|------|-------|
| H(2A)  | 5813 | 9628  | 5398 | 78    |
| H(3A)  | 5807 | 9574  | 6542 | 109   |
| H(5A)  | 6725 | 7534  | 6616 | 89    |
| H(6A)  | 6785 | 7538  | 5470 | 60    |
| H(7A)  | 7341 | 8439  | 3175 | 52    |
| H(8A)  | 7311 | 8832  | 2065 | 59    |
| H(10A) | 5118 | 9315  | 2145 | 50    |
| H(13A) | 4156 | 9131  | 2744 | 46    |
| H(15A) | 3564 | 8818  | 4584 | 57    |
| H(16A) | 4789 | 8638  | 4946 | 61    |
| H(18A) | 6353 | 10554 | 1543 | 89    |
| H(18B) | 5481 | 10349 | 1480 | 89    |
| H(18C) | 5905 | 10477 | 829  | 89    |
| H(19A) | 5465 | 9157  | 404  | 96    |
| H(19B) | 5038 | 9049  | 1057 | 96    |
| H(19C) | 5632 | 8425  | 865  | 96    |
| H(20A) | 7276 | 9593  | 1205 | 96    |
| H(20B) | 6815 | 9505  | 497  | 96    |
| H(20C) | 7003 | 8768  | 946  | 96    |
| H(22A) | 3050 | 9834  | 2610 | 95    |
| H(22B) | 2260 | 9408  | 2507 | 95    |
| H(22C) | 3011 | 8961  | 2378 | 95    |
| H(23A) | 2806 | 10199 | 3712 | 74    |
| H(23B) | 2605 | 9584  | 4252 | 74    |
| H(23C) | 2014 | 9775  | 3637 | 74    |
| H(24A) | 2560 | 8208  | 3947 | 105   |
| H(24B) | 2697 | 7958  | 3209 | 105   |
| H(24C) | 1954 | 8413  | 3346 | 105   |
| H(26A) | 3489 | 1557  | 3036 | 57    |
| H(27A) | 3744 | 1454  | 4173 | 60    |
| H(29A) | 5795 | 640   | 3879 | 64    |
| H(30A) | 5517 | 701   | 2716 | 55    |
| H(31A) | 4372 | 2590  | 2510 | 50    |
| H(32A) | 4143 | 3865  | 2257 | 54    |
| H(34A) | 3263 | 3249  | 441  | 46    |
| H(37A) | 2952 | 2294  | -220 | 46    |
| H(39A) | 3249 | 21    | -489 | 55    |

|        |      |      |       |     |
|--------|------|------|-------|-----|
| H(40A) | 3837 | -49  | 593   | 54  |
| H(42A) | 4562 | 4895 | 1638  | 95  |
| H(42B) | 4219 | 5504 | 1107  | 95  |
| H(42C) | 4596 | 4738 | 864   | 95  |
| H(43A) | 3294 | 4809 | 2127  | 101 |
| H(43B) | 2561 | 4630 | 1644  | 101 |
| H(43C) | 2978 | 5433 | 1599  | 101 |
| H(44A) | 3064 | 5229 | 387   | 102 |
| H(44B) | 2672 | 4411 | 410   | 102 |
| H(44C) | 3476 | 4489 | 134   | 102 |
| H(46A) | 1554 | 1078 | -757  | 82  |
| H(46B) | 1470 | 1522 | -1448 | 82  |
| H(46C) | 1793 | 1955 | -790  | 82  |
| H(47A) | 3442 | 1660 | -1636 | 90  |
| H(47B) | 2958 | 2311 | -1324 | 90  |
| H(47C) | 2641 | 1888 | -1989 | 90  |
| H(48A) | 3017 | 302  | -1611 | 98  |
| H(48B) | 2209 | 538  | -1946 | 98  |
| H(48C) | 2285 | 89   | -1256 | 98  |
| H(49A) | 5164 | 8074 | 9336  | 101 |
| H(50A) | 5225 | 7998 | 8203  | 105 |
| H(51A) | 4196 | 8308 | 7495  | 112 |
| H(52A) | 3116 | 8695 | 7892  | 102 |
| H(53A) | 3005 | 8616 | 8994  | 97  |
| H(54A) | 4000 | 8295 | 9760  | 98  |
| H(55A) | 1664 | 5848 | 2133  | 129 |
| H(56A) | 1523 | 6997 | 2724  | 130 |
| H(57A) | 1115 | 8069 | 2161  | 118 |
| H(58A) | 577  | 8077 | 1123  | 102 |
| H(59A) | 534  | 6923 | 582   | 107 |
| H(60A) | 1158 | 5860 | 1009  | 117 |
| H(61A) | -207 | 6361 | 4489  | 209 |
| H(62A) | 358  | 7338 | 3916  | 203 |
| H(63A) | 879  | 7005 | 2956  | 200 |
| H(64A) | 1234 | 5789 | 2780  | 200 |
| H(65A) | 370  | 4882 | 3106  | 202 |
| H(66A) | 26   | 5089 | 4200  | 208 |

---



### Structure Determination of Complex 5a.

Colorless blocks of **5a** were grown from an acetone/pentane solution at 25 deg. C. A crystal of dimensions 0.28 x 0.16 x 0.16 mm mounted on a Bruker SMART APEX CCD-based X-ray diffractometer equipped with a low temperature device and fine focus Mo-target X-ray tube ( $\lambda = 0.71073 \text{ \AA}$ ) operated at 1500 W power (50 kV, 30 mA). The X-ray intensities were measured at 85(2) K; the detector was placed at a distance 5.055 cm from the crystal. A total of 3336 frames were collected with a scan width of  $0.5^\circ$  in  $\omega$  and  $0.45^\circ$  in  $\phi$  with an exposure time of 20 s/frame. The integration of the data yielded a total of 44156 reflections to a maximum  $2\theta$  value of  $56.74^\circ$  of which 7631 were independent and 6810 were greater than  $2s(I)$ . The final cell constants (Table 1) were based on the xyz centroids of 9998 reflections above  $10s(I)$ . Analysis of the data showed negligible decay during data collection; the data were processed with SADABS and corrected for absorption. The structure was solved and refined with the Bruker SHELXTL software package, using the space group  $P1\bar{1}21$  with  $Z = 4$  for the formula  $C_{24}H_{29}F_5N_2Pd, 2(C_3H_6O)$ . All non-hydrogen atoms were refined anisotropically with the hydrogen atoms placed in idealized positions. The para-fluorophenyl ligand is disordered over two positions modeled by placement of partial occupancy atoms. Restraints (SADI/SIMU/DELU) were employed to maintain chemically sensible geometries. Full matrix least-squares refinement based on  $F^2$  converged at  $R1 = 0.0448$  and  $wR2 = 0.1019$  [based on  $I > 2\sigma(I)$ ],  $R1 = 0.0524$  and  $wR2 = 0.1088$  for all data. Additional details are presented in Table 1 and are given as Supporting Information in a CIF file.

Sheldrick, G.M. SHELXTL, v. 2008/3; Bruker Analytical X-ray, Madison, WI, 2008.  
Sheldrick, G.M. SADABS, v. 2008/1. Program for Empirical Absorption Correction of Area Detector Data, University of Gottingen: Gottingen, Germany, 2008.  
Saint Plus, v. 7.53, Bruker Analytical X-ray, Madison, WI, 2008.

**Table S7.** Crystal data and structure refinement for **5a**.

|                                   |                                                                                                                                       |
|-----------------------------------|---------------------------------------------------------------------------------------------------------------------------------------|
| Identification code               | <b>5a</b>                                                                                                                             |
| Empirical formula                 | C30 H41 F5 N2 O2 Pd                                                                                                                   |
| Formula weight                    | 663.05                                                                                                                                |
| Temperature                       | 85(2) K                                                                                                                               |
| Wavelength                        | 0.71073 Å                                                                                                                             |
| Crystal system, space group       | Triclinic, P-1                                                                                                                        |
| Unit cell dimensions              | a = 9.6894(7) Å    alpha = 73.672(1) deg.<br>b = 12.7681(9) Å    beta = 77.180(1) deg.<br>c = 13.8914(10) Å    gamma = 69.587(1) deg. |
| Volume                            | 1530.97(19) Å <sup>3</sup>                                                                                                            |
| Z, Calculated density             | 2, 1.438 Mg/m <sup>3</sup>                                                                                                            |
| Absorption coefficient            | 0.665 mm <sup>-1</sup>                                                                                                                |
| F(000)                            | 684                                                                                                                                   |
| Crystal size                      | 0.28 x 0.16 x 0.16 mm                                                                                                                 |
| Theta range for data collection   | 1.75 to 28.36 deg.                                                                                                                    |
| Limiting indices                  | -12 ≤ h ≤ 12, -17 ≤ k ≤ 17, -18 ≤ l ≤ 18                                                                                              |
| Reflections collected / unique    | 44156 / 7631 [R(int) = 0.0399]                                                                                                        |
| Completeness to theta =           | 28.36    99.8 %                                                                                                                       |
| Absorption correction             | Semi-empirical from equivalents                                                                                                       |
| Max. and min. transmission        | 0.9010 and 0.8356                                                                                                                     |
| Refinement method                 | Full-matrix least-squares on F <sup>2</sup>                                                                                           |
| Data / restraints / parameters    | 7631 / 96 / 438                                                                                                                       |
| Goodness-of-fit on F <sup>2</sup> | 1.105                                                                                                                                 |
| Final R indices [I > 2σ(I)]       | R1 = 0.0448, wR2 = 0.1019                                                                                                             |
| R indices (all data)              | R1 = 0.0526, wR2 = 0.1088                                                                                                             |
| Largest diff. peak and hole       | 1.715 and -2.979 e.Å <sup>-3</sup>                                                                                                    |

**Table S8.** Atomic coordinates ( $\times 10^4$ ) and equivalent isotropic displacement parameters ( $\text{\AA}^2 \times 10^3$ ) for **5a**.

U(eq) is defined as one third of the trace of the orthogonalized Uij tensor.

|        | x        | y        | z        | U(eq) |
|--------|----------|----------|----------|-------|
| Pd(1)  | 1752(1)  | -293(1)  | 2261(1)  | 29(1) |
| F(1)   | 2605(2)  | -1369(2) | 1392(1)  | 37(1) |
| F(2)   | 2559(2)  | -1419(2) | 3408(1)  | 58(1) |
| F(3)   | -224(2)  | -757(2)  | 2656(2)  | 48(1) |
| F(4)   | 7524(5)  | 727(4)   | 1311(4)  | 32(1) |
| F(4A)  | 7365(5)  | 1311(5)  | 1100(4)  | 37(1) |
| F(5)   | -2057(2) | 223(2)   | 3785(2)  | 46(1) |
| N(1)   | 841(2)   | 904(2)   | 3045(2)  | 27(1) |
| N(2)   | 775(2)   | 954(2)   | 1183(2)  | 20(1) |
| C(1)   | 957(3)   | 775(3)   | 4015(2)  | 38(1) |
| C(2)   | 252(3)   | 1652(3)  | 4511(2)  | 38(1) |
| C(3)   | -610(3)  | 2705(3)  | 4016(2)  | 30(1) |
| C(4)   | -733(3)  | 2814(3)  | 3001(2)  | 27(1) |
| C(5)   | 3(3)     | 1918(3)  | 2532(2)  | 23(1) |
| C(6)   | -29(3)   | 1941(2)  | 1475(2)  | 22(1) |
| C(7)   | -787(3)  | 2874(2)  | 798(2)   | 26(1) |
| C(8)   | -743(3)  | 2802(3)  | -197(2)  | 26(1) |
| C(9)   | 63(3)    | 1760(2)  | -460(2)  | 23(1) |
| C(10)  | 814(3)   | 852(2)   | 246(2)   | 22(1) |
| C(11)  | -1435(4) | 3702(3)  | 4521(2)  | 36(1) |
| C(12)  | -965(5)  | 3490(4)  | 5561(2)  | 49(1) |
| C(13)  | -3106(4) | 3856(3)  | 4659(2)  | 42(1) |
| C(14)  | -1110(5) | 4788(3)  | 3851(2)  | 47(1) |
| C(15)  | -1607(4) | 3840(3)  | -927(2)  | 32(1) |
| C(16)  | -1273(4) | 3637(3)  | -2001(2) | 36(1) |
| C(17)  | -1191(5) | 4899(3)  | -946(2)  | 41(1) |
| C(18)  | -3266(4) | 4013(4)  | -550(3)  | 49(1) |
| C(19)  | 3603(12) | -12(7)   | 1894(8)  | 14(2) |
| C(19A) | 3620(11) | 345(8)   | 1886(9)  | 20(2) |
| C(20)  | 4177(6)  | 367(5)   | 916(4)   | 22(1) |
| C(20A) | 3518(7)  | 1459(6)  | 1299(5)  | 37(1) |
| C(21)  | 5520(6)  | 611(5)   | 707(4)   | 26(1) |
| C(21A) | 4820(7)  | 1784(6)  | 1024(5)  | 39(2) |
| C(22)  | 6224(7)  | 475(7)   | 1511(6)  | 21(1) |
| C(22A) | 6120(8)  | 991(8)   | 1341(6)  | 28(2) |

|        |         |         |         |        |
|--------|---------|---------|---------|--------|
| C(23)  | 5716(6) | 65(5)   | 2501(4) | 21(1)  |
| C(23A) | 6189(7) | -63(7)  | 1903(7) | 29(1)  |
| C(24)  | 4371(6) | -167(5) | 2710(4) | 19(1)  |
| C(24A) | 4895(7) | -398(5) | 2187(5) | 29(1)  |
| O(1)   | 6766(5) | 6214(4) | 5917(4) | 100(1) |
| C(25)  | 5937(6) | 7151(5) | 6021(7) | 94(2)  |
| C(26)  | 4888(8) | 7228(6) | 7029(6) | 117(3) |
| C(27)  | 5807(8) | 8136(6) | 5221(9) | 163(5) |
| C(28)  | 6234(3) | 6081(3) | 1874(2) | 32(1)  |
| C(29)  | 4947(4) | 6251(3) | 2679(2) | 36(1)  |
| C(30)  | 6694(5) | 7107(4) | 1331(4) | 77(2)  |
| O(2)   | 6892(3) | 5152(2) | 1671(2) | 49(1)  |

---

**Table S9.** Bond lengths [Å] and angles [deg] for **5a**.

|              |            |
|--------------|------------|
| Pd(1)-C(19)  | 1.883(10)  |
| Pd(1)-F(2)   | 1.9226(18) |
| Pd(1)-F(1)   | 1.9307(19) |
| Pd(1)-N(1)   | 1.968(3)   |
| Pd(1)-N(2)   | 1.977(2)   |
| Pd(1)-F(3)   | 2.113(2)   |
| Pd(1)-C(19A) | 2.140(9)   |
| F(4)-C(22)   | 1.358(8)   |
| F(4A)-C(22A) | 1.349(8)   |
| N(1)-C(1)    | 1.336(4)   |
| N(1)-C(5)    | 1.360(4)   |
| N(2)-C(10)   | 1.335(3)   |
| N(2)-C(6)    | 1.350(4)   |
| C(1)-C(2)    | 1.373(5)   |
| C(2)-C(3)    | 1.389(4)   |
| C(3)-C(4)    | 1.404(4)   |
| C(3)-C(11)   | 1.516(5)   |
| C(4)-C(5)    | 1.372(4)   |
| C(5)-C(6)    | 1.468(4)   |
| C(6)-C(7)    | 1.381(4)   |
| C(7)-C(8)    | 1.402(4)   |
| C(8)-C(9)    | 1.392(4)   |
| C(8)-C(15)   | 1.527(4)   |
| C(9)-C(10)   | 1.388(4)   |
| C(11)-C(14)  | 1.529(5)   |
| C(11)-C(12)  | 1.534(4)   |
| C(11)-C(13)  | 1.536(5)   |
| C(15)-C(16)  | 1.531(4)   |
| C(15)-C(17)  | 1.532(5)   |
| C(15)-C(18)  | 1.533(5)   |

|               |           |
|---------------|-----------|
| C(19)-C(20)   | 1.368(11) |
| C(19)-C(24)   | 1.422(11) |
| C(19A)-C(24A) | 1.338(12) |
| C(19A)-C(20A) | 1.408(11) |
| C(20)-C(21)   | 1.392(7)  |
| C(20A)-C(21A) | 1.405(8)  |
| C(21)-C(22)   | 1.375(9)  |
| C(21A)-C(22A) | 1.383(11) |
| C(22)-C(23)   | 1.372(9)  |
| C(22A)-C(23A) | 1.340(11) |
| C(23)-C(24)   | 1.387(7)  |
| C(23A)-C(24A) | 1.403(9)  |
| O(1)-C(25)    | 1.213(6)  |
| C(25)-C(27)   | 1.413(10) |
| C(25)-C(26)   | 1.544(10) |
| C(28)-O(2)    | 1.214(4)  |
| C(28)-C(29)   | 1.477(4)  |
| C(28)-C(30)   | 1.478(5)  |

|                    |            |
|--------------------|------------|
| C(19)-Pd(1)-F(2)   | 87.1(3)    |
| C(19)-Pd(1)-F(1)   | 84.5(3)    |
| F(2)-Pd(1)-F(1)    | 92.11(9)   |
| C(19)-Pd(1)-N(1)   | 95.0(3)    |
| F(2)-Pd(1)-N(1)    | 92.61(10)  |
| F(1)-Pd(1)-N(1)    | 175.21(8)  |
| C(19)-Pd(1)-N(2)   | 95.5(3)    |
| F(2)-Pd(1)-N(2)    | 174.08(9)  |
| F(1)-Pd(1)-N(2)    | 93.47(9)   |
| N(1)-Pd(1)-N(2)    | 81.84(9)   |
| C(19)-Pd(1)-F(3)   | 174.9(3)   |
| F(2)-Pd(1)-F(3)    | 90.59(10)  |
| F(1)-Pd(1)-F(3)    | 91.14(9)   |
| N(1)-Pd(1)-F(3)    | 89.59(9)   |
| N(2)-Pd(1)-F(3)    | 87.31(9)   |
| C(19)-Pd(1)-C(19A) | 10.9(4)    |
| F(2)-Pd(1)-C(19A)  | 92.0(3)    |
| F(1)-Pd(1)-C(19A)  | 93.9(3)    |
| N(1)-Pd(1)-C(19A)  | 85.1(3)    |
| N(2)-Pd(1)-C(19A)  | 89.6(3)    |
| F(3)-Pd(1)-C(19A)  | 174.2(3)   |
| C(1)-N(1)-C(5)     | 119.9(3)   |
| C(1)-N(1)-Pd(1)    | 125.3(2)   |
| C(5)-N(1)-Pd(1)    | 114.78(18) |
| C(10)-N(2)-C(6)    | 120.5(2)   |
| C(10)-N(2)-Pd(1)   | 124.70(19) |
| C(6)-N(2)-Pd(1)    | 114.67(17) |

|                      |          |
|----------------------|----------|
| N(1)-C(1)-C(2)       | 121.4(3) |
| C(1)-C(2)-C(3)       | 120.7(3) |
| C(2)-C(3)-C(4)       | 116.8(3) |
| C(2)-C(3)-C(11)      | 123.5(3) |
| C(4)-C(3)-C(11)      | 119.7(3) |
| C(5)-C(4)-C(3)       | 120.5(3) |
| N(1)-C(5)-C(4)       | 120.7(2) |
| N(1)-C(5)-C(6)       | 114.2(3) |
| C(4)-C(5)-C(6)       | 125.2(3) |
| N(2)-C(6)-C(7)       | 120.5(2) |
| N(2)-C(6)-C(5)       | 114.5(2) |
|                      |          |
| C(7)-C(6)-C(5)       | 125.0(3) |
| C(6)-C(7)-C(8)       | 120.3(3) |
| C(9)-C(8)-C(7)       | 117.5(3) |
| C(9)-C(8)-C(15)      | 123.1(2) |
| C(7)-C(8)-C(15)      | 119.4(3) |
| C(10)-C(9)-C(8)      | 119.9(2) |
| N(2)-C(10)-C(9)      | 121.2(3) |
| C(3)-C(11)-C(14)     | 109.3(3) |
| C(3)-C(11)-C(12)     | 111.7(3) |
| C(14)-C(11)-C(12)    | 108.5(3) |
| C(3)-C(11)-C(13)     | 108.2(3) |
| C(14)-C(11)-C(13)    | 110.1(3) |
| C(12)-C(11)-C(13)    | 108.9(3) |
| C(8)-C(15)-C(16)     | 111.3(2) |
| C(8)-C(15)-C(17)     | 109.8(2) |
| C(16)-C(15)-C(17)    | 109.0(3) |
| C(8)-C(15)-C(18)     | 107.3(3) |
| C(16)-C(15)-C(18)    | 108.7(3) |
| C(17)-C(15)-C(18)    | 110.8(3) |
| C(20)-C(19)-C(24)    | 120.5(7) |
| C(20)-C(19)-Pd(1)    | 123.6(7) |
| C(24)-C(19)-Pd(1)    | 115.8(6) |
| C(24A)-C(19A)-C(20A) | 122.6(7) |
| C(24A)-C(19A)-Pd(1)  | 116.0(6) |
| C(20A)-C(19A)-Pd(1)  | 121.2(7) |
| C(19)-C(20)-C(21)    | 120.4(6) |
| C(21A)-C(20A)-C(19A) | 117.8(7) |
| C(22)-C(21)-C(20)    | 117.9(5) |
| C(22A)-C(21A)-C(20A) | 118.1(6) |
| F(4)-C(22)-C(23)     | 118.0(6) |
| F(4)-C(22)-C(21)     | 118.1(7) |
| C(23)-C(22)-C(21)    | 123.9(6) |
| C(23A)-C(22A)-F(4A)  | 118.7(8) |
| C(23A)-C(22A)-C(21A) | 123.1(7) |

|                      |          |
|----------------------|----------|
| F(4A)-C(22A)-C(21A)  | 118.2(8) |
| C(22)-C(23)-C(24)    | 118.1(5) |
| C(22A)-C(23A)-C(24A) | 119.5(7) |
| C(23)-C(24)-C(19)    | 119.2(6) |
| C(19A)-C(24A)-C(23A) | 119.0(7) |
| O(1)-C(25)-C(27)     | 122.1(8) |
| O(1)-C(25)-C(26)     | 117.9(7) |
| C(27)-C(25)-C(26)    | 119.6(6) |
| O(2)-C(28)-C(29)     | 122.2(3) |
| O(2)-C(28)-C(30)     | 121.5(3) |
| C(29)-C(28)-C(30)    | 116.3(3) |

---

Symmetry transformations used to generate equivalent atoms:

**Table S10.** Anisotropic displacement parameters ( $\text{\AA}^2 \times 10^3$ ) for **5a**.

The anisotropic displacement factor exponent takes the form:

$$-2 \pi^2 [ h^2 a^*^2 U_{11} + \dots + 2 h k a^* b^* U_{12} ]$$

---

|       | U11   | U22   | U33   | U23    | U13    | U12    |
|-------|-------|-------|-------|--------|--------|--------|
| Pd(1) | 17(1) | 36(1) | 19(1) | 5(1)   | 1(1)   | -1(1)  |
| F(1)  | 33(1) | 29(1) | 32(1) | 2(1)   | 6(1)   | -2(1)  |
| F(2)  | 43(1) | 60(1) | 22(1) | 12(1)  | 3(1)   | 20(1)  |
| F(3)  | 35(1) | 38(1) | 56(1) | 3(1)   | 15(1)  | -16(1) |
| F(4)  | 20(2) | 45(3) | 33(2) | -6(2)  | 0(2)   | -17(2) |
| F(4A) | 24(2) | 55(3) | 44(3) | -21(3) | 5(2)   | -25(3) |
| F(5)  | 25(1) | 79(2) | 26(1) | -5(1)  | -4(1)  | -13(1) |
| N(1)  | 14(1) | 43(1) | 15(1) | 2(1)   | -1(1)  | -5(1)  |
| N(2)  | 16(1) | 26(1) | 19(1) | 0(1)   | -5(1)  | -9(1)  |
| C(1)  | 20(1) | 60(2) | 15(1) | 1(1)   | -3(1)  | 5(1)   |
| C(2)  | 24(1) | 65(2) | 13(1) | -3(1)  | -5(1)  | -4(1)  |
| C(3)  | 27(1) | 48(2) | 15(1) | -4(1)  | -4(1)  | -14(1) |
| C(4)  | 31(1) | 35(2) | 16(1) | 0(1)   | -7(1)  | -12(1) |
| C(5)  | 19(1) | 35(2) | 16(1) | 1(1)   | -6(1)  | -12(1) |
| C(6)  | 23(1) | 28(1) | 18(1) | -3(1)  | -6(1)  | -12(1) |
| C(7)  | 34(2) | 27(1) | 18(1) | -5(1)  | -10(1) | -6(1)  |
| C(8)  | 29(1) | 30(1) | 19(1) | -4(1)  | -10(1) | -6(1)  |
| C(9)  | 24(1) | 31(1) | 20(1) | -8(1)  | -6(1)  | -10(1) |
| C(10) | 18(1) | 28(1) | 23(1) | -6(1)  | -4(1)  | -10(1) |
| C(11) | 46(2) | 49(2) | 14(1) | -6(1)  | -6(1)  | -14(2) |

---

|        |        |       |         |        |        |        |
|--------|--------|-------|---------|--------|--------|--------|
| C(12)  | 65(2)  | 68(3) | 16(1)   | -11(2) | -10(2) | -20(2) |
| C(13)  | 44(2)  | 49(2) | 22(1)   | -9(1)  | -2(1)  | -2(2)  |
| C(14)  | 71(3)  | 54(2) | 20(1)   | -10(1) | -5(2)  | -23(2) |
| C(15)  | 42(2)  | 35(2) | 16(1)   | -7(1)  | -13(1) | 0(1)   |
| C(16)  | 50(2)  | 37(2) | 19(1)   | -7(1)  | -15(1) | -2(1)  |
| C(17)  | 66(2)  | 28(2) | 21(1)   | -7(1)  | -17(1) | 3(2)   |
| C(18)  | 41(2)  | 66(2) | 24(2)   | -6(2)  | -16(1) | 7(2)   |
| C(19)  | 17(3)  | 16(4) | 17(3)   | -8(3)  | 0(2)   | -12(3) |
| C(19A) | 12(2)  | 29(5) | 28(3)   | -16(4) | 2(2)   | -14(4) |
| C(20)  | 15(2)  | 30(3) | 17(2)   | 2(2)   | -4(2)  | -7(2)  |
| C(20A) | 24(3)  | 42(3) | 39(3)   | 5(3)   | -6(2)  | -14(3) |
| C(21)  | 16(2)  | 38(3) | 19(2)   | 2(2)   | 1(2)   | -10(2) |
| C(21A) | 33(3)  | 42(4) | 41(4)   | 2(3)   | -1(3)  | -22(3) |
| C(22)  | 14(3)  | 18(4) | 30(4)   | -1(3)  | -2(2)  | -7(3)  |
| C(22A) | 21(3)  | 42(4) | 28(4)   | -15(4) | 5(2)   | -17(3) |
| C(23)  | 17(2)  | 29(3) | 18(2)   | -9(2)  | -2(2)  | -5(2)  |
| C(23A) | 16(3)  | 31(4) | 43(4)   | -17(3) | -6(3)  | -4(3)  |
| C(24)  | 18(2)  | 26(3) | 13(2)   | -8(2)  | 1(2)   | -6(2)  |
| C(24A) | 25(3)  | 27(3) | 37(3)   | -6(3)  | -5(3)  | -8(2)  |
| O(1)   | 96(3)  | 65(2) | 116(4)  | -33(2) | -6(3)  | 10(2)  |
| C(25)  | 57(3)  | 50(3) | 188(7)  | -53(4) | -50(4) | 8(2)   |
| C(26)  | 118(6) | 96(5) | 145(7)  | -88(5) | -48(5) | 26(4)  |
| C(27)  | 69(4)  | 68(4) | 322(14) | 36(6)  | -61(6) | -26(3) |
| C(28)  | 31(2)  | 36(2) | 22(1)   | -2(1)  | -8(1)  | -2(1)  |
| C(29)  | 37(2)  | 34(2) | 32(2)   | -7(1)  | -2(1)  | -8(1)  |
| C(30)  | 42(2)  | 54(3) | 92(4)   | 29(2)  | 8(2)   | -9(2)  |
| O(2)   | 53(2)  | 50(2) | 31(1)   | -19(1) | -9(1)  | 10(1)  |

---

**Table S11.** Hydrogen coordinates ( $\times 10^4$ ) and isotropic displacement parameters ( $\text{\AA}^2 \times 10^3$ ) for **5a**.

---

|        | x         | y        | z        | U(eq)  |
|--------|-----------|----------|----------|--------|
| H(5F)  | -1210(80) | -220(60) | 3300(50) | 70(20) |
| H(1A)  | 1540      | 62       | 4369     | 46     |
| H(2A)  | 354       | 1537     | 5201     | 45     |
| H(4A)  | -1329     | 3512     | 2637     | 33     |
| H(7A)  | -1340     | 3568     | 1009     | 32     |
| H(9A)  | 100       | 1670     | -1122    | 28     |
| H(10A) | 1367      | 144      | 60       | 27     |



|        |       |       |       |     |
|--------|-------|-------|-------|-----|
| H(12A) | -1231 | 2827  | 6014  | 74  |
| H(12B) | -1477 | 4168  | 5847  | 74  |
| H(12C) | 112   | 3340  | 5485  | 74  |
| H(13A) | -3416 | 3993  | 3997  | 63  |
| H(13B) | -3663 | 4512  | 4967  | 63  |
| H(13C) | -3306 | 3162  | 5099  | 63  |
| H(14A) | -41   | 4679  | 3763  | 70  |
| H(14B) | -1655 | 5436  | 4172  | 70  |
| H(14C) | -1426 | 4945  | 3188  | 70  |
| H(16A) | -206  | 3488  | -2239 | 55  |
| H(16B) | -1833 | 4318  | -2454 | 55  |
| H(16C) | -1566 | 2975  | -1999 | 55  |
| H(17A) | -1480 | 5072  | -273  | 61  |
| H(17B) | -1712 | 5554  | -1439 | 61  |
| H(17C) | -116  | 4748  | -1139 | 61  |
| H(18A) | -3502 | 3319  | -527  | 73  |
| H(18B) | -3855 | 4664  | -1011 | 73  |
| H(18C) | -3500 | 4166  | 130   | 73  |
| H(20A) | 3656  | 466   | 377   | 26  |
| H(20B) | 2600  | 1973  | 1095  | 44  |
| H(21A) | 5936  | 862   | 30    | 31  |
| H(21B) | 4808  | 2527  | 631   | 47  |
| H(23A) | 6269  | -56   | 3029  | 25  |
| H(23B) | 7105  | -579  | 2107  | 35  |
| H(24A) | 3968  | -426  | 3388  | 22  |
| H(24B) | 4925  | -1142 | 2588  | 35  |
| H(26A) | 4681  | 6496  | 7327  | 176 |
| H(26B) | 3954  | 7841  | 6903  | 176 |
| H(26C) | 5362  | 7396  | 7498  | 176 |
| H(27A) | 6403  | 7915  | 4600  | 245 |
| H(27B) | 6165  | 8681  | 5394  | 245 |
| H(27C) | 4762  | 8495  | 5116  | 245 |
| H(29A) | 4656  | 5549  | 2925  | 53  |
| H(29B) | 4113  | 6886  | 2406  | 53  |
| H(29C) | 5218  | 6430  | 3239  | 53  |
| H(30A) | 7098  | 7344  | 1793  | 115 |
| H(30B) | 5832  | 7731  | 1083  | 115 |
| H(30C) | 7457  | 6925  | 756   | 115 |

---

**Table S12.** Hydrogen bonds for **5a** [Å and deg.].

---

| D-H...A           | d(D-H)  | d(H...A) | d(D...A) | <(DHA) |
|-------------------|---------|----------|----------|--------|
| F(5)-H(5F)...F(3) | 1.05(7) | 1.29(7)  | 2.344(3) | 176(7) |

---

Symmetry transformations used to generate equivalent atoms:
